# Supplementary material for: Vehicle routing strategies for pick-up and delivery service under two dimensional loading constraints
Source: Springer Nature journal article supplement (doi:10.1007/s12351-015-0218-5), 2015-12-11
Supplement: 12351_2015_218_MOESM1_ESM.pdf [file 12351_2015_218_MOESM1_ESM.pdf]

Supplementary Material for the article:

**Vehicle routing strategies for pick-up and delivery service under two dimensional loading constraints**

Table A.1. Computational Results obtained for the 2|O|SPD configuration of the 2L-SPD model

| Instance       | PD Class 0 |          |          |             |           | PD Class 1 |          |          |             |           | PD Class 2 |          |          |             |           |
|----------------|------------|----------|----------|-------------|-----------|------------|----------|----------|-------------|-----------|------------|----------|----------|-------------|-----------|
|                | <i>bst</i> | <i>v</i> | <i>t</i> | <i>avg</i>  | <i>%g</i> | <i>bst</i> | <i>v</i> | <i>t</i> | <i>avg</i>  | <i>%g</i> | <i>bst</i> | <i>v</i> | <i>t</i> | <i>avg</i>  | <i>%g</i> |
| 50-C-0         | 1330.59    | 13       | 482      | 1330.59     | 0.00      | 1109.45    | 11       | 728      | 1109.45     | 0.00      | 866.13     | 8        | 259      | 866.13      | 0.00      |
| 70-C-0         | 1246.88    | 18       | 883      | 1246.88     | 0.00      | 1009.11    | 14       | 2584     | 1013.45     | 0.43      | 825.65     | 11       | 3155     | 825.65      | 0.00      |
| 90-C-0         | 2174.28    | 23       | 1145     | 2184.98     | 0.49      | 1815.42    | 19       | 1421     | 1833.15     | 0.98      | 1448.17    | 14       | 4478     | 1450.08     | 0.13      |
| 110-C-0        | 2118.63    | 28       | 5220     | 2120.33     | 0.08      | 1790.79    | 22       | 9502     | 1796.75     | 0.33      | 1414.11    | 17       | 1777     | 1415.34     | 0.09      |
| 130-C-0        | 2986.24    | 33       | 2860     | 3016.29     | 1.01      | 2464.37    | 27       | 5001     | 2477.73     | 0.54      | 2026.10    | 21       | 5082     | 2037.98     | 0.59      |
| 150-C-0        | 3159.15    | 37       | 4092     | 3190.87     | 1.00      | 2559.84    | 31       | 5381     | 2568.70     | 0.35      | 2090.74    | 23       | 9842     | 2117.79     | 1.29      |
| 50-C-1         | 1335.33    | 13       | 453      | 1337.38     | 0.15      | 1075.86    | 10       | 616      | 1076.29     | 0.04      | 953.44     | 8        | 316      | 953.95      | 0.05      |
| 70-C-1         | 1129.34    | 17       | 592      | 1129.34     | 0.00      | 1045.91    | 14       | 140      | 1052.42     | 0.62      | 798.50     | 10       | 277      | 798.75      | 0.03      |
| 90-C-1         | 2048.41    | 22       | 553      | 2094.42     | 2.25      | 1700.36    | 18       | 751      | 1713.48     | 0.77      | 1358.91    | 14       | 1094     | 1370.06     | 0.82      |
| 110-C-1        | 2000.32    | 27       | 1216     | 2005.53     | 0.26      | 1687.24    | 21       | 936      | 1696.16     | 0.53      | 1350.87    | 16       | 1203     | 1363.35     | 0.92      |
| 130-C-1        | 2829.87    | 31       | 1332     | 2848.30     | 0.65      | 2307.73    | 25       | 1106     | 2337.65     | 1.30      | 1903.54    | 19       | 1769     | 1919.26     | 0.83      |
| 150-C-1        | 3072.81    | 37       | 1774     | 3085.81     | 0.42      | 2477.77    | 29       | 801      | 2498.71     | 0.84      | 2038.26    | 23       | 2457     | 2056.48     | 0.89      |
| 50-C-2         | 2082.88    | 21       | 74       | 2082.88     | 0.00      | 1924.55    | 19       | 33       | 1924.55     | 0.00      | 1519.79    | 13       | 40       | 1519.79     | 0.00      |
| 70-C-2         | 1901.28    | 30       | 656      | 1906.98     | 0.30      | 1503.35    | 21       | 321      | 1503.38     | 0.00      | 1408.05    | 20       | 157      | 1408.99     | 0.07      |
| 90-C-2         | 3414.60    | 37       | 653      | 3440.22     | 0.75      | 2739.99    | 31       | 341      | 2741.87     | 0.07      | 2428.83    | 22       | 567      | 2437.36     | 0.35      |
| 110-C-2        | 3911.04    | 51       | 1158     | 3943.32     | 0.83      | 3192.88    | 40       | 301      | 3235.56     | 1.34      | 2460.56    | 30       | 146      | 2486.82     | 1.07      |
| 130-C-2        | 4694.43    | 54       | 508      | 4710.12     | 0.33      | 4221.98    | 45       | 222      | 4250.56     | 0.68      | 3212.07    | 33       | 631      | 3227.92     | 0.49      |
| 150-C-2        | 4839.35    | 60       | 955      | 4900.14     | 1.26      | 4065.44    | 49       | 311      | 4106.72     | 1.02      | 3348.80    | 35       | 623      | 3369.60     | 0.62      |
| 50-R-0         | 1327.00    | 13       | 1696     | 1327.00     | 0.00      | 1168.89    | 11       | 529      | 1169.31     | 0.04      | 985.69     | 8        | 590      | 985.69      | 0.00      |
| 70-R-0         | 1752.93    | 18       | 1965     | 1754.01     | 0.06      | 1459.94    | 14       | 6564     | 1464.65     | 0.32      | 1240.36    | 11       | 7448     | 1243.97     | 0.29      |
| 90-R-0         | 2212.39    | 24       | 4864     | 2218.78     | 0.29      | 1897.65    | 19       | 3717     | 1905.89     | 0.43      | 1525.79    | 14       | 5970     | 1528.03     | 0.15      |
| 110-R-0        | 2668.42    | 28       | 1929     | 2674.62     | 0.23      | 2224.44    | 22       | 6364     | 2233.14     | 0.39      | 1907.41    | 17       | 12297    | 1918.99     | 0.61      |
| 130-R-0        | 3097.20    | 33       | 2807     | 3112.27     | 0.49      | 2628.33    | 27       | 5349     | 2637.66     | 0.35      | 2172.94    | 21       | 6605     | 2185.03     | 0.56      |
| 150-R-0        | 3334.11    | 38       | 5327     | 3351.86     | 0.53      | 2929.38    | 32       | 4897     | 2940.13     | 0.37      | 2362.34    | 23       | 14258    | 2385.89     | 1.00      |
| 50-R-1         | 1353.87    | 13       | 864      | 1354.59     | 0.05      | 1131.04    | 10       | 1069     | 1132.48     | 0.13      | 1013.06    | 8        | 218      | 1013.33     | 0.03      |
| 70-R-1         | 1652.98    | 17       | 587      | 1663.34     | 0.63      | 1464.43    | 14       | 363      | 1468.57     | 0.28      | 1211.17    | 10       | 1318     | 1217.19     | 0.50      |
| 90-R-1         | 2131.03    | 22       | 852      | 2142.82     | 0.55      | 1808.40    | 18       | 1349     | 1819.11     | 0.59      | 1496.78    | 14       | 1607     | 1504.39     | 0.51      |
| 110-R-1        | 2546.56    | 27       | 950      | 2557.92     | 0.45      | 2143.16    | 21       | 1885     | 2157.39     | 0.66      | 1850.81    | 17       | 1634     | 1862.59     | 0.64      |
| 130-R-1        | 2959.86    | 31       | 1463     | 2974.50     | 0.49      | 2490.17    | 25       | 475      | 2510.11     | 0.80      | 2097.36    | 19       | 749      | 2125.37     | 1.34      |
| 150-R-1        | 3303.68    | 37       | 1073     | 3322.21     | 0.56      | 2759.18    | 29       | 1431     | 2785.81     | 0.97      | 2284.27    | 23       | 2551     | 2304.01     | 0.86      |
| 50-R-2         | 2064.70    | 21       | 64       | 2064.70     | 0.00      | 1949.38    | 19       | 24       | 1949.38     | 0.00      | 1513.57    | 13       | 106      | 1513.99     | 0.03      |
| 70-R-2         | 2708.03    | 31       | 422      | 2708.59     | 0.02      | 2303.87    | 22       | 420      | 2306.62     | 0.12      | 2035.28    | 20       | 276      | 2036.50     | 0.06      |
| 90-R-2         | 3310.68    | 37       | 543      | 3317.52     | 0.21      | 2758.76    | 30       | 446      | 2762.21     | 0.13      | 2408.99    | 22       | 482      | 2421.65     | 0.53      |
| 110-R-2        | 4519.14    | 52       | 1257     | 4531.38     | 0.27      | 3838.50    | 42       | 208      | 3858.16     | 0.51      | 3132.07    | 28       | 511      | 3148.05     | 0.51      |
| 130-R-2        | 4915.10    | 55       | 814      | 4937.64     | 0.46      | 4288.15    | 47       | 831      | 4322.00     | 0.79      | 3411.77    | 33       | 258      | 3435.07     | 0.68      |
| 150-R-2        | 5334.60    | 59       | 769      | 5378.26     | 0.82      | 4323.69    | 48       | 859      | 4354.10     | 0.70      | 3669.59    | 36       | 765      | 3685.18     | 0.42      |
| <i>average</i> |            |          |          | <i>0.44</i> |           |            |          |          | <i>0.48</i> |           |            |          |          | <i>0.47</i> |           |

*bst*: The best solution cost obtained over the ten runs, *v*: The number of routes contained in the best solution obtained over the ten runs  
*t*: The average CPU time (in seconds) elapsed when the best solutions of the ten runs were obtained, *avg*: The average solution cost over the ten runs  
*%g*: The average gap between the best and average solution cost obtained over the ten runs (=  $100 \cdot (\text{avg} - \text{bst}) / \text{bst}$ ).

Table A.2. Computational Results obtained for the 2|R|SPD configuration of the 2L-SPD model

| Instance       | PD Class 0 |    |      |         |             | PD Class 1 |    |      |         |             | PD Class 2 |    |       |         |             |
|----------------|------------|----|------|---------|-------------|------------|----|------|---------|-------------|------------|----|-------|---------|-------------|
|                | bst        | v  | t    | avg     | %g          | bst        | v  | t    | avg     | %g          | bst        | v  | t     | avg     | %g          |
| 50-C-0         | 1302.82    | 12 | 696  | 1303.25 | 0.03        | 1068.64    | 10 | 811  | 1090.81 | 2.07        | 854.97     | 8  | 3378  | 858.83  | 0.45        |
| 70-C-0         | 1197.56    | 17 | 2390 | 1202.83 | 0.44        | 985.08     | 14 | 922  | 996.52  | 1.16        | 821.93     | 10 | 3265  | 831.21  | 1.13        |
| 90-C-0         | 2132.25    | 22 | 1423 | 2144.39 | 0.57        | 1772.99    | 19 | 1182 | 1792.90 | 1.12        | 1413.70    | 14 | 5008  | 1415.92 | 0.16        |
| 110-C-0        | 2082.88    | 27 | 3936 | 2084.13 | 0.06        | 1712.58    | 22 | 6483 | 1731.95 | 1.13        | 1360.48    | 17 | 4351  | 1396.82 | 2.67        |
| 130-C-0        | 2923.99    | 33 | 894  | 2934.76 | 0.37        | 2408.91    | 26 | 1353 | 2426.89 | 0.75        | 1933.31    | 20 | 7001  | 1939.41 | 0.32        |
| 150-C-0        | 3070.63    | 36 | 6850 | 3083.21 | 0.41        | 2465.75    | 30 | 2606 | 2498.52 | 1.33        | 2045.16    | 23 | 1139  | 2056.07 | 0.53        |
| 50-C-1         | 1324.94    | 13 | 68   | 1325.98 | 0.08        | 1066.90    | 10 | 305  | 1067.81 | 0.09        | 952.91     | 8  | 83    | 952.91  | 0.00        |
| 70-C-1         | 1121.23    | 16 | 389  | 1122.51 | 0.11        | 1031.04    | 14 | 66   | 1034.46 | 0.33        | 787.06     | 10 | 386   | 789.29  | 0.28        |
| 90-C-1         | 2021.86    | 22 | 553  | 2030.80 | 0.44        | 1681.54    | 18 | 596  | 1688.96 | 0.44        | 1323.20    | 13 | 126   | 1324.98 | 0.13        |
| 110-C-1        | 1946.81    | 26 | 316  | 1978.24 | 1.61        | 1668.01    | 21 | 298  | 1672.03 | 0.24        | 1309.01    | 16 | 651   | 1316.12 | 0.54        |
| 130-C-1        | 2748.53    | 30 | 295  | 2783.06 | 1.26        | 2262.12    | 24 | 445  | 2293.88 | 1.40        | 1854.22    | 19 | 1152  | 1877.58 | 1.26        |
| 150-C-1        | 2983.82    | 35 | 706  | 3025.82 | 1.41        | 2437.43    | 29 | 256  | 2444.89 | 0.31        | 1996.47    | 22 | 1328  | 2021.89 | 1.27        |
| 50-C-2         | 2000.15    | 20 | 37   | 2000.15 | 0.00        | 1913.71    | 18 | 175  | 1913.77 | 0.00        | 1515.00    | 13 | 56    | 1515.00 | 0.00        |
| 70-C-2         | 1880.40    | 30 | 414  | 1883.98 | 0.19        | 1490.20    | 21 | 410  | 1490.25 | 0.00        | 1371.97    | 19 | 260   | 1373.21 | 0.09        |
| 90-C-2         | 3252.77    | 35 | 240  | 3305.94 | 1.63        | 2669.76    | 29 | 68   | 2689.83 | 0.75        | 2320.42    | 21 | 196   | 2336.37 | 0.69        |
| 110-C-2        | 3818.68    | 49 | 579  | 3829.84 | 0.29        | 3085.58    | 39 | 538  | 3138.42 | 1.71        | 2387.89    | 29 | 499   | 2408.42 | 0.86        |
| 130-C-2        | 4573.45    | 52 | 361  | 4615.03 | 0.91        | 4150.05    | 45 | 461  | 4212.35 | 1.50        | 3113.82    | 32 | 379   | 3147.34 | 1.08        |
| 150-C-2        | 4700.10    | 59 | 866  | 4749.65 | 1.05        | 3990.39    | 47 | 856  | 4071.71 | 2.04        | 3266.04    | 34 | 432   | 3284.73 | 0.57        |
| 50-R-0         | 1280.85    | 12 | 2155 | 1282.68 | 0.14        | 1137.78    | 10 | 1393 | 1137.78 | 0.00        | 967.01     | 8  | 1705  | 968.94  | 0.20        |
| 70-R-0         | 1697.72    | 17 | 1422 | 1701.93 | 0.25        | 1416.53    | 14 | 4095 | 1422.00 | 0.39        | 1210.92    | 11 | 5329  | 1214.58 | 0.30        |
| 90-R-0         | 2151.74    | 23 | 2630 | 2159.50 | 0.36        | 1831.30    | 18 | 4819 | 1841.25 | 0.54        | 1506.53    | 14 | 7293  | 1510.67 | 0.27        |
| 110-R-0        | 2588.77    | 27 | 2947 | 2600.61 | 0.46        | 2186.13    | 22 | 4570 | 2201.42 | 0.70        | 1855.72    | 17 | 13660 | 1870.56 | 0.80        |
| 130-R-0        | 3022.40    | 32 | 5634 | 3037.19 | 0.49        | 2541.95    | 26 | 3104 | 2559.33 | 0.68        | 2113.31    | 20 | 7051  | 2127.12 | 0.65        |
| 150-R-0        | 3231.27    | 36 | 5771 | 3258.97 | 0.86        | 2818.31    | 31 | 4625 | 2843.07 | 0.88        | 2283.72    | 23 | 13281 | 2297.41 | 0.60        |
| 50-R-1         | 1302.77    | 13 | 59   | 1302.77 | 0.00        | 1102.58    | 10 | 71   | 1102.73 | 0.01        | 987.63     | 8  | 10    | 990.88  | 0.33        |
| 70-R-1         | 1628.69    | 17 | 251  | 1633.15 | 0.27        | 1428.03    | 14 | 112  | 1428.53 | 0.03        | 1192.04    | 10 | 1031  | 1196.34 | 0.36        |
| 90-R-1         | 2093.17    | 22 | 810  | 2097.97 | 0.23        | 1757.56    | 18 | 635  | 1760.58 | 0.17        | 1460.83    | 13 | 859   | 1472.19 | 0.78        |
| 110-R-1        | 2482.88    | 26 | 76   | 2490.76 | 0.32        | 2092.81    | 20 | 771  | 2103.35 | 0.50        | 1800.99    | 16 | 1564  | 1818.24 | 0.96        |
| 130-R-1        | 2899.78    | 31 | 925  | 2914.18 | 0.50        | 2419.08    | 24 | 843  | 2435.20 | 0.67        | 2071.88    | 19 | 1495  | 2084.94 | 0.63        |
| 150-R-1        | 3223.02    | 36 | 355  | 3250.40 | 0.85        | 2681.74    | 28 | 474  | 2708.96 | 1.02        | 2244.54    | 22 | 1601  | 2267.53 | 1.02        |
| 50-R-2         | 1995.97    | 21 | 73   | 1996.14 | 0.01        | 1861.42    | 19 | 12   | 1861.42 | 0.00        | 1462.78    | 13 | 69    | 1462.78 | 0.00        |
| 70-R-2         | 2641.13    | 31 | 735  | 2642.68 | 0.06        | 2238.20    | 22 | 378  | 2239.73 | 0.07        | 1994.12    | 19 | 86    | 1996.86 | 0.14        |
| 90-R-2         | 3142.75    | 36 | 307  | 3151.82 | 0.29        | 2640.08    | 29 | 362  | 2644.85 | 0.18        | 2306.25    | 22 | 128   | 2313.93 | 0.33        |
| 110-R-2        | 4436.35    | 51 | 917  | 4466.39 | 0.68        | 3662.41    | 40 | 382  | 3669.63 | 0.20        | 3056.60    | 28 | 373   | 3072.96 | 0.54        |
| 130-R-2        | 4782.98    | 53 | 554  | 4828.25 | 0.95        | 4177.69    | 47 | 504  | 4197.66 | 0.48        | 3338.15    | 32 | 389   | 3354.67 | 0.49        |
| 150-R-2        | 5231.54    | 57 | 917  | 5257.35 | 0.49        | 4253.93    | 48 | 598  | 4282.03 | 0.66        | 3575.41    | 34 | 707   | 3593.23 | 0.50        |
| <i>average</i> |            |    |      |         | <i>0.50</i> |            |    |      |         | <i>0.65</i> |            |    |       |         | <i>0.58</i> |

The notation of Table A.1 is used

Table A.3. Computational Results obtained for the 2|OU|VRPB configuration of the 2L-VRPB model

| Instance       | PD Class 0 |    |      |         |             | PD Class 1 |    |      |         |             | PD Class 2 |    |      |         |             |
|----------------|------------|----|------|---------|-------------|------------|----|------|---------|-------------|------------|----|------|---------|-------------|
|                | bst        | v  | t    | avg     | %g          | bst        | v  | t    | avg     | %g          | bst        | v  | t    | avg     | %g          |
| 50-C-0         | 1340.75    | 13 | 433  | 1340.75 | 0.00        | 1148.62    | 11 | 1926 | 1149.25 | 0.05        | 925.48     | 8  | 1413 | 925.77  | 0.03        |
| 70-C-0         | 1270.22    | 18 | 3604 | 1272.00 | 0.14        | 1066.70    | 14 | 1451 | 1070.58 | 0.36        | 945.89     | 11 | 4491 | 953.02  | 0.75        |
| 90-C-0         | 2202.77    | 23 | 4840 | 2212.76 | 0.45        | 1883.43    | 19 | 3417 | 1887.26 | 0.20        | 1536.26    | 14 | 5067 | 1558.34 | 1.44        |
| 110-C-0        | 2144.86    | 28 | 2567 | 2148.19 | 0.16        | 1862.74    | 22 | 4914 | 1866.87 | 0.22        | 1508.66    | 17 | 8868 | 1518.31 | 0.64        |
| 130-C-0        | 3029.02    | 33 | 1436 | 3072.45 | 1.43        | 2553.57    | 27 | 2971 | 2582.57 | 1.14        | 2151.35    | 21 | 6606 | 2161.49 | 0.47        |
| 150-C-0        | 3207.90    | 38 | 3144 | 3223.86 | 0.50        | 2658.84    | 31 | 3836 | 2697.94 | 1.47        | 2253.61    | 24 | 7265 | 2279.23 | 1.14        |
| 50-C-1         | 1346.95    | 13 | 258  | 1347.59 | 0.05        | 1110.01    | 10 | 502  | 1110.54 | 0.05        | 1005.41    | 8  | 939  | 1005.49 | 0.01        |
| 70-C-1         | 1149.79    | 17 | 808  | 1149.96 | 0.01        | 1073.34    | 14 | 190  | 1085.98 | 1.18        | 890.76     | 10 | 2002 | 894.23  | 0.39        |
| 90-C-1         | 2061.34    | 22 | 1513 | 2101.73 | 1.96        | 1743.45    | 18 | 1218 | 1758.74 | 0.88        | 1447.42    | 14 | 1969 | 1466.79 | 1.34        |
| 110-C-1        | 2027.78    | 27 | 1389 | 2034.22 | 0.32        | 1741.11    | 21 | 857  | 1750.74 | 0.55        | 1411.96    | 16 | 2137 | 1431.55 | 1.39        |
| 130-C-1        | 2850.36    | 31 | 1822 | 2866.69 | 0.57        | 2401.61    | 25 | 1209 | 2412.12 | 0.44        | 2008.00    | 19 | 1509 | 2023.30 | 0.76        |
| 150-C-1        | 3105.43    | 37 | 1231 | 3129.11 | 0.76        | 2584.77    | 29 | 931  | 2632.40 | 1.84        | 2175.51    | 22 | 1335 | 2202.38 | 1.24        |
| 50-C-2         | 2086.37    | 21 | 274  | 2086.37 | 0.00        | 1927.75    | 19 | 206  | 1927.75 | 0.00        | 1570.35    | 13 | 153  | 1570.42 | 0.00        |
| 70-C-2         | 1907.55    | 30 | 155  | 1916.25 | 0.46        | 1523.98    | 21 | 285  | 1529.18 | 0.34        | 1424.81    | 19 | 242  | 1429.32 | 0.32        |
| 90-C-2         | 3419.63    | 37 | 579  | 3435.15 | 0.45        | 2749.95    | 31 | 110  | 2756.94 | 0.25        | 2417.77    | 22 | 572  | 2443.06 | 1.05        |
| 110-C-2        | 3928.76    | 52 | 176  | 3945.56 | 0.43        | 3199.18    | 40 | 291  | 3223.50 | 0.76        | 2477.78    | 30 | 290  | 2494.94 | 0.69        |
| 130-C-2        | 4704.21    | 54 | 484  | 4743.04 | 0.83        | 4263.83    | 46 | 595  | 4290.47 | 0.62        | 3228.95    | 33 | 480  | 3253.98 | 0.78        |
| 150-C-2        | 4867.38    | 60 | 1193 | 4924.02 | 1.16        | 4102.20    | 49 | 819  | 4141.16 | 0.95        | 3369.65    | 36 | 391  | 3395.53 | 0.77        |
| 50-R-0         | 1362.93    | 13 | 4351 | 1363.13 | 0.01        | 1246.95    | 11 | 146  | 1246.95 | 0.00        | 1187.95    | 8  | 977  | 1187.95 | 0.00        |
| 70-R-0         | 1808.73    | 18 | 1365 | 1808.78 | 0.00        | 1623.99    | 14 | 6465 | 1631.97 | 0.49        | 1472.10    | 11 | 1833 | 1474.22 | 0.14        |
| 90-R-0         | 2275.17    | 24 | 3681 | 2283.57 | 0.37        | 2017.80    | 19 | 3521 | 2030.75 | 0.64        | 1717.77    | 14 | 4384 | 1732.48 | 0.86        |
| 110-R-0        | 2752.07    | 28 | 1861 | 2761.82 | 0.35        | 2405.28    | 22 | 2213 | 2424.23 | 0.79        | 2136.77    | 17 | 6453 | 2154.29 | 0.82        |
| 130-R-0        | 3160.05    | 33 | 3520 | 3173.18 | 0.42        | 2793.65    | 27 | 3516 | 2824.15 | 1.09        | 2423.85    | 21 | 5214 | 2450.03 | 1.08        |
| 150-R-0        | 3415.93    | 38 | 1270 | 3431.70 | 0.46        | 3072.53    | 31 | 2587 | 3105.08 | 1.06        | 2643.40    | 23 | 8255 | 2676.31 | 1.24        |
| 50-R-1         | 1357.02    | 13 | 362  | 1374.83 | 1.31        | 1217.62    | 10 | 284  | 1217.85 | 0.02        | 1201.14    | 8  | 1004 | 1203.60 | 0.20        |
| 70-R-1         | 1694.33    | 17 | 370  | 1702.75 | 0.50        | 1578.53    | 14 | 909  | 1587.50 | 0.57        | 1429.04    | 10 | 1144 | 1437.87 | 0.62        |
| 90-R-1         | 2187.35    | 22 | 1227 | 2200.34 | 0.59        | 1921.80    | 19 | 370  | 1930.69 | 0.46        | 1665.51    | 14 | 452  | 1680.54 | 0.90        |
| 110-R-1        | 2613.54    | 27 | 808  | 2623.09 | 0.37        | 2292.36    | 21 | 1515 | 2321.91 | 1.29        | 2041.36    | 16 | 819  | 2059.33 | 0.88        |
| 130-R-1        | 3012.63    | 31 | 1316 | 3043.05 | 1.01        | 2661.16    | 25 | 683  | 2684.96 | 0.89        | 2328.07    | 19 | 1748 | 2363.78 | 1.53        |
| 150-R-1        | 3371.89    | 37 | 864  | 3389.60 | 0.53        | 2932.66    | 29 | 1048 | 2956.86 | 0.83        | 2515.74    | 23 | 1788 | 2536.19 | 0.81        |
| 50-R-2         | 2084.20    | 21 | 305  | 2084.20 | 0.00        | 1965.52    | 19 | 66   | 1965.52 | 0.00        | 1568.72    | 13 | 29   | 1571.80 | 0.20        |
| 70-R-2         | 2719.26    | 31 | 829  | 2719.26 | 0.00        | 2336.03    | 22 | 67   | 2342.73 | 0.29        | 2091.64    | 20 | 307  | 2094.18 | 0.12        |
| 90-R-2         | 3328.86    | 37 | 689  | 3347.76 | 0.57        | 2770.60    | 30 | 290  | 2780.59 | 0.36        | 2393.74    | 22 | 75   | 2396.93 | 0.13        |
| 110-R-2        | 4534.83    | 51 | 708  | 4556.63 | 0.48        | 3849.32    | 42 | 475  | 3869.78 | 0.53        | 3176.40    | 28 | 449  | 3203.84 | 0.86        |
| 130-R-2        | 4963.33    | 54 | 568  | 4984.29 | 0.42        | 4340.86    | 47 | 559  | 4375.04 | 0.79        | 3485.41    | 33 | 333  | 3507.89 | 0.64        |
| 150-R-2        | 5391.25    | 59 | 185  | 5432.39 | 0.76        | 4377.22    | 48 | 295  | 4399.41 | 0.51        | 3727.19    | 36 | 627  | 3757.75 | 0.82        |
| <i>average</i> |            |    |      |         | <i>0.50</i> |            |    |      |         | <i>0.61</i> |            |    |      |         | <i>0.70</i> |

The notation of Table A.1 is used

Table A.4. Computational Results obtained for the 2|OS|VRPB configuration of the 2L-VRPB model

| Instance       | PD Class 0 |    |      |         |             | PD Class 1 |    |      |         |             | PD Class 2 |    |      |         |             |
|----------------|------------|----|------|---------|-------------|------------|----|------|---------|-------------|------------|----|------|---------|-------------|
|                | bst        | v  | t    | avg     | %g          | bst        | v  | t    | avg     | %g          | bst        | v  | t    | avg     | %g          |
| 50-C-0         | 1341.02    | 13 | 3199 | 1341.02 | 0.00        | 1148.62    | 11 | 1505 | 1149.11 | 0.04        | 925.48     | 8  | 3925 | 925.86  | 0.04        |
| 70-C-0         | 1270.56    | 18 | 3759 | 1271.48 | 0.07        | 1066.70    | 14 | 1815 | 1071.39 | 0.44        | 952.37     | 11 | 5707 | 955.39  | 0.32        |
| 90-C-0         | 2204.70    | 23 | 875  | 2218.52 | 0.63        | 1884.20    | 19 | 1618 | 1887.17 | 0.16        | 1536.84    | 14 | 2338 | 1550.37 | 0.88        |
| 110-C-0        | 2144.86    | 28 | 3699 | 2161.50 | 0.78        | 1862.74    | 22 | 4471 | 1873.85 | 0.60        | 1509.05    | 17 | 5328 | 1516.70 | 0.51        |
| 130-C-0        | 3056.30    | 33 | 1463 | 3073.35 | 0.56        | 2558.17    | 27 | 4526 | 2584.39 | 1.02        | 2156.74    | 21 | 3855 | 2162.31 | 0.26        |
| 150-C-0        | 3207.90    | 38 | 1513 | 3229.02 | 0.66        | 2658.84    | 31 | 4250 | 2691.31 | 1.22        | 2261.42    | 24 | 3073 | 2291.22 | 1.32        |
| 50-C-1         | 1369.85    | 13 | 910  | 1424.59 | 4.00        | 1147.52    | 10 | 3650 | 1149.59 | 0.18        | 1009.79    | 8  | 3827 | 1010.66 | 0.09        |
| 70-C-1         | 1159.75    | 17 | 3557 | 1166.56 | 0.59        | 1094.99    | 15 | 1976 | 1098.05 | 0.28        | 901.68     | 10 | 6293 | 909.99  | 0.92        |
| 90-C-1         | 2190.70    | 22 | 360  | 2190.70 | 0.00        | 1801.60    | 18 | 1667 | 1821.20 | 1.09        | 1516.55    | 14 | 516  | 1526.27 | 0.64        |
| 110-C-1        | 2038.29    | 28 | 1037 | 2057.34 | 0.93        | 1767.05    | 21 | 2448 | 1782.01 | 0.85        | 1440.51    | 17 | 3967 | 1460.22 | 1.37        |
| 130-C-1        | 2918.69    | 32 | 1275 | 2938.17 | 0.67        | 2443.61    | 26 | 1978 | 2472.89 | 1.20        | 2056.90    | 20 | 983  | 2075.56 | 0.91        |
| 150-C-1        | 3149.26    | 37 | 2473 | 3206.03 | 1.80        | 2675.08    | 30 | 1274 | 2727.38 | 1.96        | 2219.14    | 23 | 3076 | 2246.53 | 1.23        |
| 50-C-2         | 2091.44    | 21 | 494  | 2091.44 | 0.00        | 1957.09    | 19 | 11   | 1957.09 | 0.00        | 1588.05    | 13 | 259  | 1591.55 | 0.22        |
| 70-C-2         | 1907.55    | 30 | 1377 | 1913.13 | 0.29        | 1528.30    | 21 | 311  | 1530.30 | 0.13        | 1431.32    | 19 | 370  | 1435.12 | 0.26        |
| 90-C-2         | 3426.28    | 37 | 1563 | 3442.11 | 0.46        | 2757.73    | 31 | 143  | 2774.39 | 0.60        | 2461.44    | 22 | 1657 | 2465.64 | 0.17        |
| 110-C-2        | 3967.28    | 52 | 459  | 4006.88 | 1.00        | 3203.13    | 40 | 791  | 3232.74 | 0.92        | 2493.36    | 30 | 1032 | 2513.35 | 0.80        |
| 130-C-2        | 4723.64    | 54 | 1324 | 4753.40 | 0.63        | 4285.64    | 46 | 726  | 4312.22 | 0.62        | 3251.68    | 33 | 733  | 3272.95 | 0.65        |
| 150-C-2        | 4890.84    | 60 | 718  | 4929.75 | 0.80        | 4146.15    | 49 | 673  | 4163.74 | 0.42        | 3388.86    | 36 | 935  | 3410.11 | 0.63        |
| 50-R-0         | 1362.93    | 13 | 6328 | 1363.16 | 0.02        | 1246.95    | 11 | 3514 | 1246.95 | 0.00        | 1187.95    | 8  | 2304 | 1187.95 | 0.00        |
| 70-R-0         | 1808.73    | 18 | 3255 | 1808.75 | 0.00        | 1626.56    | 14 | 4842 | 1638.22 | 0.72        | 1472.10    | 11 | 5462 | 1475.63 | 0.24        |
| 90-R-0         | 2277.41    | 24 | 4139 | 2287.10 | 0.43        | 2019.21    | 19 | 3396 | 2031.40 | 0.60        | 1720.56    | 14 | 4330 | 1731.71 | 0.65        |
| 110-R-0        | 2756.00    | 28 | 5114 | 2773.78 | 0.65        | 2413.16    | 23 | 4036 | 2429.48 | 0.68        | 2138.57    | 17 | 8822 | 2159.35 | 0.97        |
| 130-R-0        | 3165.37    | 33 | 3671 | 3185.90 | 0.65        | 2793.84    | 27 | 1528 | 2836.18 | 1.52        | 2424.62    | 20 | 2215 | 2453.44 | 1.19        |
| 150-R-0        | 3415.93    | 38 | 2713 | 3437.03 | 0.62        | 3072.53    | 31 | 3794 | 3101.85 | 0.95        | 2654.13    | 23 | 5031 | 2701.16 | 1.77        |
| 50-R-1         | 1376.74    | 13 | 195  | 1377.92 | 0.09        | 1233.99    | 10 | 2280 | 1234.98 | 0.08        | 1203.45    | 8  | 2716 | 1208.52 | 0.42        |
| 70-R-1         | 1729.93    | 17 | 2042 | 1737.82 | 0.46        | 1640.51    | 14 | 1090 | 1656.95 | 1.00        | 1463.12    | 10 | 1844 | 1472.64 | 0.65        |
| 90-R-1         | 2236.88    | 23 | 1511 | 2244.18 | 0.33        | 1941.09    | 19 | 597  | 1949.90 | 0.45        | 1692.51    | 14 | 2085 | 1707.60 | 0.89        |
| 110-R-1        | 2661.62    | 28 | 2335 | 2672.21 | 0.40        | 2399.08    | 21 | 1350 | 2399.08 | 0.00        | 2070.32    | 17 | 2627 | 2089.20 | 0.91        |
| 130-R-1        | 3062.89    | 32 | 2267 | 3087.50 | 0.80        | 2761.50    | 25 | 818  | 2786.66 | 0.91        | 2389.10    | 20 | 1321 | 2411.56 | 0.94        |
| 150-R-1        | 3465.95    | 37 | 2191 | 3497.88 | 0.92        | 2996.06    | 30 | 1735 | 3024.59 | 0.95        | 2588.64    | 23 | 1657 | 2618.76 | 1.16        |
| 50-R-2         | 2087.87    | 21 | 32   | 2087.87 | 0.00        | 1981.98    | 19 | 45   | 1981.98 | 0.00        | 1583.59    | 13 | 118  | 1585.35 | 0.11        |
| 70-R-2         | 2727.18    | 31 | 1066 | 2729.54 | 0.09        | 2349.81    | 22 | 392  | 2360.24 | 0.44        | 2097.07    | 20 | 96   | 2100.45 | 0.16        |
| 90-R-2         | 3349.77    | 37 | 1124 | 3378.85 | 0.87        | 2796.94    | 30 | 329  | 2800.50 | 0.13        | 2456.61    | 22 | 465  | 2468.91 | 0.50        |
| 110-R-2        | 4549.27    | 53 | 465  | 4566.78 | 0.38        | 3858.50    | 42 | 451  | 3872.23 | 0.36        | 3198.62    | 28 | 330  | 3231.91 | 1.04        |
| 130-R-2        | 4965.68    | 54 | 383  | 5007.74 | 0.85        | 4346.58    | 47 | 417  | 4382.12 | 0.82        | 3503.76    | 34 | 214  | 3519.74 | 0.46        |
| 150-R-2        | 5391.25    | 59 | 817  | 5441.78 | 0.94        | 4419.51    | 49 | 228  | 4441.28 | 0.49        | 3752.01    | 36 | 471  | 3776.54 | 0.65        |
| <i>average</i> |            |    |      |         | <i>0.62</i> |            |    |      |         | <i>0.61</i> |            |    |      |         | <i>0.67</i> |

The notation of Table A.1 is used

Table A.5. Computational Results obtained for the 2|RU|VRPB configuration of the 2L-VRPB model

| Instance       | PD Class 0 |          |          |            |             | PD Class 1 |          |          |            |             | PD Class 2 |          |          |            |             |
|----------------|------------|----------|----------|------------|-------------|------------|----------|----------|------------|-------------|------------|----------|----------|------------|-------------|
|                | <i>bst</i> | <i>v</i> | <i>t</i> | <i>avg</i> | <i>%g</i>   | <i>bst</i> | <i>v</i> | <i>t</i> | <i>avg</i> | <i>%g</i>   | <i>bst</i> | <i>v</i> | <i>t</i> | <i>avg</i> | <i>%g</i>   |
| 50-C-0         | 1318.56    | 12       | 1308     | 1319.72    | 0.09        | 1119.05    | 10       | 1711     | 1130.51    | 1.02        | 923.03     | 8        | 1435     | 937.13     | 1.53        |
| 70-C-0         | 1218.89    | 17       | 4634     | 1224.00    | 0.42        | 1040.88    | 14       | 1653     | 1049.89    | 0.87        | 929.50     | 10       | 10410    | 937.33     | 0.84        |
| 90-C-0         | 2177.06    | 23       | 935      | 2178.09    | 0.05        | 1834.51    | 19       | 5984     | 1837.74    | 0.18        | 1488.20    | 13       | 5692     | 1522.60    | 2.31        |
| 110-C-0        | 2104.65    | 27       | 3420     | 2106.51    | 0.09        | 1772.04    | 21       | 7404     | 1790.81    | 1.06        | 1460.05    | 17       | 10685    | 1487.27    | 1.86        |
| 130-C-0        | 2973.59    | 32       | 4220     | 2979.77    | 0.21        | 2493.59    | 26       | 2674     | 2509.83    | 0.65        | 2057.00    | 20       | 7814     | 2065.27    | 0.40        |
| 150-C-0        | 3120.85    | 36       | 5803     | 3140.03    | 0.61        | 2578.62    | 31       | 1406     | 2598.75    | 0.78        | 2200.96    | 23       | 2978     | 2208.94    | 0.36        |
| 50-C-1         | 1334.16    | 13       | 781      | 1335.77    | 0.12        | 1102.14    | 10       | 736      | 1102.77    | 0.06        | 1003.70    | 8        | 594      | 1003.98    | 0.03        |
| 70-C-1         | 1141.41    | 17       | 593      | 1142.79    | 0.12        | 1065.93    | 14       | 663      | 1068.81    | 0.27        | 883.49     | 10       | 113      | 886.34     | 0.32        |
| 90-C-1         | 2036.93    | 22       | 526      | 2043.19    | 0.31        | 1724.10    | 18       | 1007     | 1734.29    | 0.59        | 1399.39    | 13       | 807      | 1410.01    | 0.76        |
| 110-C-1        | 1978.39    | 26       | 1047     | 2002.30    | 1.21        | 1715.61    | 21       | 431      | 1728.63    | 0.76        | 1391.68    | 17       | 1042     | 1396.98    | 0.38        |
| 130-C-1        | 2761.77    | 30       | 1378     | 2803.96    | 1.53        | 2348.39    | 24       | 1091     | 2372.30    | 1.02        | 1982.61    | 19       | 1449     | 1999.53    | 0.85        |
| 150-C-1        | 3029.52    | 36       | 1234     | 3050.14    | 0.68        | 2528.78    | 29       | 836      | 2545.78    | 0.67        | 2139.84    | 22       | 1377     | 2157.27    | 0.81        |
| 50-C-2         | 2002.18    | 20       | 108      | 2002.18    | 0.00        | 1916.58    | 19       | 36       | 1916.61    | 0.00        | 1553.03    | 13       | 74       | 1553.03    | 0.00        |
| 70-C-2         | 1881.15    | 30       | 452      | 1886.34    | 0.28        | 1515.50    | 21       | 142      | 1518.20    | 0.18        | 1389.10    | 20       | 153      | 1390.52    | 0.10        |
| 90-C-2         | 3262.52    | 36       | 434      | 3309.39    | 1.44        | 2680.07    | 29       | 216      | 2693.37    | 0.50        | 2339.23    | 21       | 69       | 2353.45    | 0.61        |
| 110-C-2        | 3821.72    | 50       | 617      | 3841.56    | 0.52        | 3093.59    | 39       | 264      | 3099.19    | 0.18        | 2411.61    | 29       | 271      | 2423.13    | 0.48        |
| 130-C-2        | 4580.92    | 52       | 402      | 4628.55    | 1.04        | 4157.77    | 45       | 518      | 4200.42    | 1.03        | 3148.47    | 33       | 159      | 3178.23    | 0.95        |
| 150-C-2        | 4728.39    | 58       | 992      | 4752.53    | 0.51        | 4023.93    | 47       | 743      | 4088.12    | 1.60        | 3298.15    | 35       | 124      | 3312.15    | 0.42        |
| 50-R-0         | 1309.34    | 12       | 5173     | 1318.34    | 0.69        | 1229.20    | 10       | 6335     | 1239.35    | 0.83        | 1177.96    | 8        | 833      | 1178.13    | 0.01        |
| 70-R-0         | 1766.83    | 17       | 3816     | 1768.36    | 0.09        | 1566.39    | 14       | 401      | 1576.34    | 0.64        | 1456.01    | 11       | 4160     | 1459.36    | 0.23        |
| 90-R-0         | 2206.17    | 23       | 6302     | 2214.72    | 0.39        | 1972.08    | 18       | 5352     | 1988.16    | 0.82        | 1690.13    | 14       | 6153     | 1704.18    | 0.83        |
| 110-R-0        | 2678.39    | 27       | 3195     | 2699.54    | 0.79        | 2371.80    | 22       | 2702     | 2388.08    | 0.69        | 2103.88    | 17       | 7559     | 2121.32    | 0.83        |
| 130-R-0        | 3088.87    | 32       | 4995     | 3103.77    | 0.48        | 2741.20    | 26       | 2840     | 2770.50    | 1.07        | 2357.71    | 20       | 5923     | 2369.38    | 0.49        |
| 150-R-0        | 3317.69    | 36       | 3418     | 3326.85    | 0.28        | 3008.32    | 30       | 1188     | 3030.04    | 0.72        | 2569.98    | 22       | 6823     | 2597.93    | 1.09        |
| 50-R-1         | 1315.56    | 13       | 41       | 1315.56    | 0.00        | 1190.55    | 10       | 812      | 1194.04    | 0.29        | 1171.63    | 8        | 189      | 1171.79    | 0.01        |
| 70-R-1         | 1682.83    | 17       | 938      | 1684.19    | 0.08        | 1545.71    | 14       | 83       | 1552.56    | 0.44        | 1405.73    | 10       | 1076     | 1411.05    | 0.38        |
| 90-R-1         | 2149.74    | 22       | 195      | 2155.80    | 0.28        | 1876.54    | 18       | 390      | 1885.44    | 0.47        | 1637.42    | 14       | 1232     | 1652.95    | 0.95        |
| 110-R-1        | 2564.06    | 27       | 1002     | 2576.34    | 0.48        | 2254.97    | 20       | 604      | 2268.09    | 0.58        | 2003.98    | 16       | 391      | 2019.60    | 0.78        |
| 130-R-1        | 2949.01    | 31       | 1216     | 2964.54    | 0.53        | 2584.80    | 24       | 578      | 2618.52    | 1.30        | 2293.07    | 19       | 966      | 2325.30    | 1.41        |
| 150-R-1        | 3284.13    | 36       | 1160     | 3312.97    | 0.88        | 2855.15    | 28       | 986      | 2887.44    | 1.13        | 2473.07    | 22       | 1565     | 2497.07    | 0.97        |
| 50-R-2         | 2012.62    | 21       | 703      | 2012.62    | 0.00        | 1879.47    | 19       | 11       | 1879.47    | 0.00        | 1531.78    | 13       | 168      | 1531.78    | 0.00        |
| 70-R-2         | 2662.79    | 31       | 374      | 2663.73    | 0.04        | 2292.51    | 22       | 247      | 2297.40    | 0.21        | 2054.97    | 19       | 233      | 2058.91    | 0.19        |
| 90-R-2         | 3155.77    | 36       | 544      | 3168.14    | 0.39        | 2689.99    | 29       | 357      | 2695.53    | 0.21        | 2326.12    | 22       | 148      | 2334.86    | 0.38        |
| 110-R-2        | 4452.64    | 51       | 86       | 4482.97    | 0.68        | 3694.01    | 40       | 216      | 3703.76    | 0.26        | 3103.60    | 28       | 427      | 3116.64    | 0.42        |
| 130-R-2        | 4809.55    | 53       | 131      | 4849.83    | 0.84        | 4231.55    | 47       | 452      | 4265.40    | 0.80        | 3428.31    | 32       | 122      | 3444.88    | 0.48        |
| 150-R-2        | 5245.58    | 58       | 378      | 5282.36    | 0.70        | 4297.18    | 48       | 245      | 4321.06    | 0.56        | 3652.71    | 35       | 597      | 3661.68    | 0.25        |
| <i>average</i> |            |          |          |            | <i>0.47</i> |            |          |          |            | <i>0.62</i> |            |          |          |            | <i>0.63</i> |

The notation of Table A.1 is used

Table A.6. Computational Results obtained for the 2|RS|VRPB configuration of the 2L-VRPB model

| Instance       | PD Class 0 |    |       |         |             | PD Class 1 |    |      |         |             | PD Class 2 |    |       |         |             |
|----------------|------------|----|-------|---------|-------------|------------|----|------|---------|-------------|------------|----|-------|---------|-------------|
|                | bst        | v  | t     | avg     | %g          | bst        | v  | t    | avg     | %g          | bst        | v  | t     | avg     | %g          |
| 50-C-0         | 1331.89    | 12 | 9705  | 1333.57 | 0.13        | 1146.85    | 11 | 3079 | 1147.50 | 0.06        | 924.41     | 8  | 7217  | 925.03  | 0.07        |
| 70-C-0         | 1236.66    | 17 | 11158 | 1249.55 | 1.04        | 1062.10    | 14 | 1535 | 1063.88 | 0.17        | 934.31     | 11 | 4137  | 944.27  | 1.07        |
| 90-C-0         | 2178.81    | 23 | 7694  | 2180.46 | 0.08        | 1845.90    | 19 | 4488 | 1860.61 | 0.80        | 1527.28    | 14 | 6875  | 1543.22 | 1.04        |
| 110-C-0        | 2118.97    | 27 | 8079  | 2123.21 | 0.20        | 1811.24    | 22 | 4137 | 1844.93 | 1.86        | 1506.81    | 17 | 5219  | 1516.07 | 0.61        |
| 130-C-0        | 2986.09    | 33 | 6063  | 2996.81 | 0.36        | 2522.27    | 27 | 2860 | 2544.48 | 0.88        | 2069.08    | 20 | 8130  | 2103.32 | 1.65        |
| 150-C-0        | 3172.57    | 37 | 6756  | 3183.22 | 0.34        | 2618.97    | 31 | 3548 | 2632.32 | 0.51        | 2234.58    | 23 | 11365 | 2254.54 | 0.89        |
| 50-C-1         | 1343.04    | 13 | 2050  | 1343.13 | 0.01        | 1110.33    | 10 | 3435 | 1112.54 | 0.20        | 1007.01    | 8  | 3153  | 1007.09 | 0.01        |
| 70-C-1         | 1148.43    | 17 | 2945  | 1149.00 | 0.05        | 1084.80    | 14 | 1751 | 1088.44 | 0.34        | 898.73     | 10 | 392   | 902.10  | 0.38        |
| 90-C-1         | 2095.02    | 22 | 3877  | 2134.22 | 1.87        | 1759.76    | 18 | 3096 | 1777.31 | 1.00        | 1462.62    | 14 | 3537  | 1506.55 | 3.00        |
| 110-C-1        | 2022.32    | 27 | 3402  | 2032.13 | 0.49        | 1740.95    | 21 | 1109 | 1755.97 | 0.86        | 1426.41    | 17 | 3427  | 1442.70 | 1.14        |
| 130-C-1        | 2858.54    | 31 | 2248  | 2887.09 | 1.00        | 2399.71    | 25 | 1799 | 2412.14 | 0.52        | 2011.49    | 19 | 3522  | 2035.58 | 1.20        |
| 150-C-1        | 3108.18    | 37 | 2512  | 3141.61 | 1.08        | 2592.78    | 30 | 1791 | 2628.54 | 1.38        | 2195.00    | 23 | 455   | 2216.64 | 0.99        |
| 50-C-2         | 2042.95    | 21 | 34    | 2042.95 | 0.00        | 1918.47    | 18 | 31   | 1918.51 | 0.00        | 1565.66    | 13 | 865   | 1565.92 | 0.02        |
| 70-C-2         | 1884.69    | 30 | 1616  | 1890.23 | 0.29        | 1515.50    | 21 | 659  | 1517.58 | 0.14        | 1394.89    | 20 | 483   | 1395.32 | 0.03        |
| 90-C-2         | 3318.80    | 36 | 743   | 3347.01 | 0.85        | 2684.32    | 29 | 356  | 2706.76 | 0.84        | 2348.10    | 22 | 474   | 2357.69 | 0.41        |
| 110-C-2        | 3859.94    | 51 | 1224  | 3892.73 | 0.85        | 3095.26    | 39 | 566  | 3103.58 | 0.27        | 2433.16    | 30 | 1188  | 2445.13 | 0.49        |
| 130-C-2        | 4580.92    | 52 | 598   | 4634.73 | 1.17        | 4183.99    | 45 | 339  | 4222.12 | 0.91        | 3176.92    | 32 | 646   | 3200.01 | 0.73        |
| 150-C-2        | 4728.39    | 58 | 1051  | 4771.65 | 0.91        | 4028.59    | 47 | 1299 | 4069.56 | 1.02        | 3302.37    | 35 | 898   | 3319.09 | 0.51        |
| 50-R-0         | 1326.43    | 13 | 4175  | 1327.33 | 0.07        | 1244.89    | 11 | 3281 | 1244.89 | 0.00        | 1181.04    | 8  | 5726  | 1182.01 | 0.08        |
| 70-R-0         | 1773.39    | 18 | 7712  | 1773.58 | 0.01        | 1589.60    | 14 | 8794 | 1601.37 | 0.74        | 1469.12    | 11 | 9098  | 1471.83 | 0.18        |
| 90-R-0         | 2210.21    | 23 | 1781  | 2216.18 | 0.27        | 1998.16    | 19 | 6205 | 2010.75 | 0.63        | 1716.16    | 14 | 3974  | 1722.46 | 0.37        |
| 110-R-0        | 2714.05    | 27 | 5711  | 2733.99 | 0.73        | 2387.74    | 22 | 4334 | 2408.72 | 0.88        | 2126.40    | 17 | 5818  | 2142.16 | 0.74        |
| 130-R-0        | 3114.79    | 33 | 5893  | 3131.85 | 0.55        | 2779.60    | 27 | 1722 | 2812.70 | 1.19        | 2386.41    | 20 | 7729  | 2413.13 | 1.12        |
| 150-R-0        | 3349.58    | 37 | 3807  | 3387.90 | 1.14        | 3047.30    | 31 | 5818 | 3059.76 | 0.41        | 2608.39    | 23 | 7660  | 2643.66 | 1.35        |
| 50-R-1         | 1356.72    | 13 | 2711  | 1356.77 | 0.00        | 1211.61    | 10 | 2734 | 1213.67 | 0.17        | 1199.48    | 8  | 4547  | 1202.55 | 0.26        |
| 70-R-1         | 1710.52    | 17 | 2609  | 1712.20 | 0.10        | 1595.15    | 14 | 3907 | 1607.01 | 0.74        | 1436.88    | 10 | 4578  | 1448.37 | 0.80        |
| 90-R-1         | 2190.30    | 23 | 956   | 2198.18 | 0.36        | 1920.50    | 19 | 681  | 1926.68 | 0.32        | 1676.49    | 14 | 1165  | 1690.33 | 0.83        |
| 110-R-1        | 2630.56    | 27 | 3053  | 2643.08 | 0.48        | 2308.86    | 21 | 1560 | 2342.32 | 1.45        | 2053.48    | 17 | 3636  | 2068.38 | 0.73        |
| 130-R-1        | 3005.77    | 31 | 1746  | 3029.40 | 0.79        | 2670.47    | 25 | 1529 | 2717.30 | 1.75        | 2373.29    | 20 | 1866  | 2393.19 | 0.84        |
| 150-R-1        | 3382.20    | 37 | 2940  | 3408.83 | 0.79        | 2938.76    | 29 | 752  | 2975.14 | 1.24        | 2544.99    | 23 | 2600  | 2576.53 | 1.24        |
| 50-R-2         | 2015.59    | 21 | 844   | 2015.73 | 0.01        | 1896.16    | 19 | 25   | 1896.16 | 0.00        | 1541.35    | 13 | 190   | 1541.81 | 0.03        |
| 70-R-2         | 2672.32    | 31 | 1737  | 2672.56 | 0.01        | 2293.98    | 22 | 629  | 2304.20 | 0.45        | 2063.97    | 20 | 404   | 2066.56 | 0.13        |
| 90-R-2         | 3167.49    | 36 | 1744  | 3178.10 | 0.34        | 2703.85    | 29 | 458  | 2713.65 | 0.36        | 2340.01    | 22 | 89    | 2343.73 | 0.16        |
| 110-R-2        | 4474.58    | 51 | 142   | 4491.22 | 0.37        | 3699.03    | 40 | 688  | 3707.08 | 0.22        | 3139.43    | 28 | 800   | 3157.86 | 0.59        |
| 130-R-2        | 4845.07    | 54 | 720   | 4876.78 | 0.65        | 4268.26    | 47 | 668  | 4297.28 | 0.68        | 3435.89    | 32 | 650   | 3451.89 | 0.47        |
| 150-R-2        | 5275.30    | 58 | 384   | 5299.25 | 0.45        | 4311.83    | 47 | 898  | 4333.35 | 0.50        | 3685.30    | 36 | 529   | 3702.49 | 0.47        |
| <i>average</i> |            |    |       |         | <i>0.50</i> |            |    |      |         | <i>0.65</i> |            |    |       |         | <i>0.68</i> |

The notation of Table A.1 is used

Table A.7. Computational Results obtained for the 2|OU|BiVRP configuration of the 2L-BiVRP model

| Instance  | PD Class 0 |    |      |         |      | PD Class 1 |    |      |         |      | PD Class 2 |    |      |         |      |
|-----------|------------|----|------|---------|------|------------|----|------|---------|------|------------|----|------|---------|------|
|           | bst        | v  | t    | avg     | %g   | bst        | v  | t    | avg     | %g   | bst        | v  | t    | avg     | %g   |
| 50-C-0-D  | 1330.59    | 13 | 236  | 1330.59 | 0.00 | 1107.71    | 11 | 392  | 1107.71 | 0.00 | 842.81     | 7  | 1525 | 843.40  | 0.07 |
| 50-C-0-P  | 318.70     | 2  | 0    | 318.70  | 0.00 | 555.03     | 5  | 1    | 555.03  | 0.00 | 843.13     | 7  | 1929 | 843.33  | 0.02 |
| 70-C-0-D  | 1246.88    | 18 | 2245 | 1247.22 | 0.03 | 1007.58    | 14 | 1730 | 1009.28 | 0.17 | 812.57     | 11 | 1355 | 812.62  | 0.01 |
| 70-C-0-P  | 319.90     | 3  | 0    | 319.90  | 0.00 | 580.29     | 6  | 3698 | 580.38  | 0.02 | 779.22     | 10 | 1994 | 781.74  | 0.32 |
| 90-C-0-D  | 2172.75    | 23 | 2684 | 2178.54 | 0.27 | 1811.61    | 19 | 983  | 1821.12 | 0.52 | 1381.66    | 14 | 2676 | 1381.89 | 0.02 |
| 90-C-0-P  | 457.42     | 3  | 2    | 457.42  | 0.00 | 805.71     | 8  | 91   | 805.71  | 0.00 | 1268.68    | 12 | 2905 | 1272.84 | 0.33 |
| 110-C-0-D | 2118.52    | 28 | 2894 | 2123.14 | 0.22 | 1780.18    | 22 | 1361 | 1788.82 | 0.49 | 1389.42    | 17 | 2951 | 1394.43 | 0.36 |
| 110-C-0-P | 454.89     | 4  | 53   | 454.89  | 0.00 | 868.97     | 10 | 2803 | 873.85  | 0.56 | 1245.73    | 15 | 2985 | 1246.86 | 0.09 |
| 130-C-0-D | 2988.13    | 33 | 2439 | 3013.28 | 0.84 | 2464.14    | 27 | 2451 | 2473.91 | 0.40 | 1990.91    | 21 | 1808 | 1993.68 | 0.14 |
| 130-C-0-P | 645.93     | 5  | 2    | 645.93  | 0.00 | 1150.09    | 11 | 806  | 1150.09 | 0.00 | 1715.26    | 17 | 1120 | 1739.35 | 1.40 |
| 150-C-0-D | 3151.80    | 37 | 1148 | 3179.78 | 0.89 | 2557.65    | 31 | 1582 | 2571.72 | 0.55 | 2065.30    | 23 | 1565 | 2077.31 | 0.58 |
| 150-C-0-P | 705.73     | 6  | 103  | 705.73  | 0.00 | 1205.11    | 12 | 4883 | 1207.80 | 0.22 | 1804.87    | 20 | 310  | 1813.48 | 0.48 |
| 50-C-1-D  | 1335.11    | 13 | 659  | 1338.16 | 0.23 | 1074.51    | 10 | 896  | 1074.51 | 0.00 | 905.69     | 8  | 76   | 905.74  | 0.01 |
| 50-C-1-P  | 294.11     | 2  | 0    | 294.11  | 0.00 | 543.83     | 5  | 0    | 543.83  | 0.00 | 831.56     | 7  | 522  | 832.12  | 0.07 |
| 70-C-1-D  | 1126.11    | 17 | 49   | 1127.20 | 0.10 | 1043.73    | 14 | 961  | 1049.59 | 0.56 | 759.71     | 10 | 149  | 760.28  | 0.08 |
| 70-C-1-P  | 315.97     | 3  | 0    | 315.97  | 0.00 | 458.56     | 6  | 279  | 458.56  | 0.00 | 769.07     | 10 | 262  | 769.07  | 0.00 |
| 90-C-1-D  | 2073.00    | 22 | 1632 | 2077.19 | 0.20 | 1694.20    | 18 | 1728 | 1704.98 | 0.64 | 1326.79    | 13 | 574  | 1326.79 | 0.00 |
| 90-C-1-P  | 446.14     | 3  | 1    | 446.14  | 0.00 | 797.41     | 7  | 523  | 797.69  | 0.04 | 1173.77    | 12 | 573  | 1200.92 | 2.31 |
| 110-C-1-D | 1999.58    | 27 | 1163 | 2005.06 | 0.27 | 1686.65    | 21 | 411  | 1692.92 | 0.37 | 1302.79    | 16 | 288  | 1303.65 | 0.07 |
| 110-C-1-P | 413.97     | 4  | 0    | 413.97  | 0.00 | 774.00     | 9  | 681  | 775.60  | 0.21 | 1129.71    | 14 | 728  | 1129.85 | 0.01 |
| 130-C-1-D | 2834.60    | 31 | 806  | 2838.69 | 0.14 | 2318.02    | 25 | 615  | 2324.18 | 0.27 | 1825.56    | 19 | 686  | 1827.80 | 0.12 |
| 130-C-1-P | 565.08     | 5  | 16   | 565.08  | 0.00 | 1101.31    | 11 | 109  | 1101.31 | 0.00 | 1625.80    | 16 | 679  | 1649.05 | 1.43 |
| 150-C-1-D | 3076.90    | 36 | 920  | 3088.34 | 0.37 | 2469.23    | 29 | 509  | 2484.21 | 0.61 | 1944.75    | 22 | 876  | 1952.48 | 0.40 |
| 150-C-1-P | 667.41     | 5  | 1902 | 668.45  | 0.16 | 1175.41    | 13 | 1084 | 1215.48 | 3.41 | 1788.76    | 19 | 175  | 1801.04 | 0.69 |
| 50-C-2-D  | 2079.44    | 21 | 107  | 2079.44 | 0.00 | 1921.76    | 19 | 31   | 1921.76 | 0.00 | 1443.85    | 13 | 5    | 1443.85 | 0.00 |
| 50-C-2-P  | 335.23     | 3  | 0    | 335.23  | 0.00 | 584.42     | 5  | 1    | 584.42  | 0.00 | 1141.70    | 11 | 9    | 1141.70 | 0.00 |
| 70-C-2-D  | 1898.45    | 30 | 488  | 1900.24 | 0.09 | 1487.95    | 21 | 418  | 1487.95 | 0.00 | 1229.32    | 16 | 198  | 1229.32 | 0.00 |
| 70-C-2-P  | 443.14     | 5  | 0    | 443.14  | 0.00 | 841.74     | 12 | 10   | 841.74  | 0.00 | 1207.20    | 18 | 157  | 1207.36 | 0.01 |
| 90-C-2-D  | 3393.54    | 37 | 443  | 3409.53 | 0.47 | 2688.74    | 31 | 38   | 2688.74 | 0.00 | 1970.56    | 21 | 1123 | 1984.47 | 0.71 |
| 90-C-2-P  | 602.63     | 6  | 0    | 602.63  | 0.00 | 1340.16    | 13 | 384  | 1342.36 | 0.16 | 2022.65    | 21 | 321  | 2046.97 | 1.20 |
| 110-C-2-D | 3905.61    | 51 | 435  | 3942.33 | 0.94 | 3170.47    | 41 | 106  | 3188.06 | 0.55 | 2326.01    | 29 | 960  | 2341.65 | 0.67 |
| 110-C-2-P | 447.18     | 4  | 52   | 447.18  | 0.00 | 1156.08    | 15 | 42   | 1156.08 | 0.00 | 2090.93    | 27 | 84   | 2110.59 | 0.94 |
| 130-C-2-D | 4693.90    | 54 | 452  | 4697.66 | 0.08 | 4200.04    | 45 | 132  | 4206.60 | 0.16 | 3050.82    | 32 | 1234 | 3063.47 | 0.41 |
| 130-C-2-P | 862.99     | 7  | 25   | 862.99  | 0.00 | 1403.69    | 14 | 75   | 1403.74 | 0.00 | 2504.64    | 27 | 515  | 2516.60 | 0.48 |
| 150-C-2-D | 4824.11    | 60 | 241  | 4851.34 | 0.56 | 3945.77    | 49 | 678  | 3958.58 | 0.32 | 2999.26    | 35 | 1118 | 3001.33 | 0.07 |
| 150-C-2-P | 939.74     | 9  | 150  | 939.74  | 0.00 | 1936.05    | 20 | 573  | 1936.05 | 0.00 | 2786.51    | 34 | 437  | 2801.75 | 0.55 |
| 50-R-0-D  | 1327.00    | 13 | 181  | 1327.00 | 0.00 | 1159.73    | 11 | 1379 | 1159.73 | 0.00 | 896.10     | 7  | 1784 | 896.10  | 0.00 |
| 50-R-0-P  | 399.25     | 2  | 0    | 399.25  | 0.00 | 588.97     | 4  | 401  | 588.97  | 0.00 | 948.36     | 7  | 3647 | 948.36  | 0.00 |
| 70-R-0-D  | 1752.93    | 18 | 571  | 1753.69 | 0.04 | 1457.05    | 14 | 2923 | 1458.43 | 0.09 | 1175.93    | 11 | 2949 | 1185.50 | 0.81 |
| 70-R-0-P  | 510.47     | 3  | 19   | 510.47  | 0.00 | 856.82     | 6  | 2904 | 856.82  | 0.00 | 1141.38    | 10 | 479  | 1141.44 | 0.01 |
| 90-R-0-D  | 2212.39    | 24 | 1192 | 2217.35 | 0.22 | 1897.65    | 19 | 6260 | 1901.41 | 0.20 | 1458.10    | 14 | 3510 | 1459.39 | 0.09 |
| 90-R-0-P  | 566.70     | 3  | 123  | 566.70  | 0.00 | 958.95     | 8  | 324  | 958.95  | 0.00 | 1347.91    | 13 | 441  | 1348.94 | 0.08 |
| 110-R-0-D | 2668.75    | 28 | 6131 | 2671.68 | 0.11 | 2212.34    | 22 | 4995 | 2221.56 | 0.42 | 1752.39    | 17 | 3336 | 1771.99 | 1.12 |
| 110-R-0-P | 705.19     | 4  | 77   | 705.19  | 0.00 | 1209.75    | 10 | 5273 | 1214.64 | 0.40 | 1674.95    | 15 | 5981 | 1677.18 | 0.13 |
| 130-R-0-D | 3097.20    | 33 | 5246 | 3104.77 | 0.24 | 2615.85    | 27 | 2882 | 2635.14 | 0.74 | 2066.28    | 20 | 2594 | 2083.21 | 0.82 |
| 130-R-0-P | 690.68     | 5  | 5    | 690.68  | 0.00 | 1334.22    | 11 | 4520 | 1339.76 | 0.42 | 1847.76    | 17 | 1771 | 1853.32 | 0.30 |
| 150-R-0-D | 3327.99    | 37 | 4260 | 3346.13 | 0.55 | 2916.63    | 32 | 228  | 2928.44 | 0.40 | 2255.64    | 23 | 7265 | 2267.66 | 0.53 |
| 150-R-0-P | 810.54     | 6  | 4330 | 810.54  | 0.00 | 1341.24    | 12 | 8154 | 1343.07 | 0.14 | 2027.34    | 20 | 6308 | 2037.01 | 0.48 |
| 50-R-1-D  | 1353.77    | 13 | 259  | 1367.29 | 1.00 | 1114.17    | 10 | 74   | 1122.43 | 0.74 | 943.09     | 8  | 56   | 943.09  | 0.00 |
| 50-R-1-P  | 378.01     | 2  | 0    | 378.01  | 0.00 | 665.16     | 5  | 16   | 665.24  | 0.01 | 888.58     | 7  | 404  | 888.58  | 0.00 |
| 70-R-1-D  | 1638.59    | 17 | 2179 | 1645.09 | 0.40 | 1448.59    | 14 | 2373 | 1456.18 | 0.52 | 1132.65    | 10 | 634  | 1133.33 | 0.06 |
| 70-R-1-P  | 514.68     | 3  | 0    | 514.68  | 0.00 | 725.62     | 5  | 239  | 725.62  | 0.00 | 1066.86    | 9  | 59   | 1068.99 | 0.20 |
| 90-R-1-D  | 2138.70    | 22 | 948  | 2145.03 | 0.30 | 1780.81    | 18 | 538  | 1795.49 | 0.82 | 1372.43    | 13 | 95   | 1397.70 | 1.84 |
| 90-R-1-P  | 512.27     | 3  | 2    | 512.27  | 0.00 | 909.88     | 7  | 1540 | 913.69  | 0.42 | 1292.84    | 12 | 721  | 1292.84 | 0.00 |
| 110-R-1-D | 2553.04    | 27 | 1000 | 2562.05 | 0.35 | 2125.09    | 21 | 958  | 2132.01 | 0.33 | 1710.18    | 16 | 382  | 1720.05 | 0.58 |
| 110-R-1-P | 618.03     | 4  | 17   | 618.03  | 0.00 | 1119.99    | 9  | 1871 | 1121.07 | 0.10 | 1492.41    | 14 | 107  | 1496.00 | 0.24 |
| 130-R-1-D | 2958.59    | 31 | 820  | 2971.02 | 0.42 | 2483.88    | 25 | 1413 | 2495.61 | 0.47 | 1947.68    | 19 | 1442 | 1960.14 | 0.64 |
| 130-R-1-P | 683.44     | 5  | 2    | 683.44  | 0.00 | 1261.10    | 11 | 1028 | 1264.61 | 0.28 | 1817.05    | 17 | 1287 | 1825.50 | 0.47 |
| 150-R-1-D | 3306.79    | 37 | 1444 | 3317.17 | 0.31 | 2744.78    | 29 | 821  | 2757.40 | 0.46 | 2192.32    | 22 | 1970 | 2209.96 | 0.80 |
| 150-R-1-P | 726.44     | 5  | 14   | 730.08  | 0.50 | 1342.79    | 12 | 3072 | 1355.77 | 0.97 | 1913.86    | 19 | 1071 | 1922.86 | 0.47 |
| 50-R-2-D  | 2063.69    | 21 | 100  | 2063.69 | 0.00 | 1932.59    | 19 | 17   | 1932.59 | 0.00 | 1404.73    | 13 | 13   | 1404.73 | 0.00 |
| 50-R-2-P  | 285.43     | 3  | 0    | 285.43  | 0.00 | 543.02     | 5  | 18   | 543.02  | 0.00 | 1088.48    | 11 | 2    | 1088.86 | 0.03 |
| 70-R-2-D  | 2664.35    | 31 | 584  | 2664.35 | 0.00 | 2181.03    | 22 | 719  | 2181.72 | 0.03 | 1602.84    | 16 | 20   | 1602.84 | 0.00 |
| 70-R-2-P  | 588.32     | 5  | 0    | 588.32  | 0.00 | 1113.60    | 12 | 3    | 1113.60 | 0.00 | 1786.33    | 19 | 241  | 1786.33 | 0.00 |
| 90-R-2-D  | 3294.18    | 37 | 758  | 3302.20 | 0.24 | 2688.99    | 30 | 230  | 2689.35 | 0.01 | 2163.30    | 22 | 99   | 2164.26 | 0.04 |
| 90-R-2-P  | 736.25     | 6  | 2    | 736.25  | 0.00 | 1356.85    | 13 | 9    | 1356.85 | 0.00 | 1874.84    | 22 | 659  | 1874.84 | 0.00 |
| 110-R-2-D | 4516.27    | 52 | 49   | 4519.47 | 0.07 | 3773.72    | 42 | 590  | 3777.85 | 0.11 | 2655.22    | 28 | 95   | 2664.20 | 0.34 |
| 110-R-2-P | 589.34     | 4  | 1    | 589.34  | 0.00 | 1386.19    | 15 | 1300 | 1386.19 | 0.00 | 2495.29    | 27 | 591  | 2495.29 | 0.00 |
| 130-R-2-D | 4901.71    | 55 | 26   | 4917.77 | 0.33 | 4212.02    | 47 | 443  | 4218.90 | 0.16 | 3241.88    | 32 | 922  | 3256.67 | 0.46 |
| 130-R-2-P | 817.68     | 7  | 21   | 817.68  | 0.00 | 1574.96    | 14 | 766  | 1577.65 | 0.17 | 2523.84    | 27 | 1181 | 2529.25 | 0.21 |
| 150-R-2-D | 5320.94    | 59 | 95   | 5346.19 | 0.47 | 4203.38    | 48 | 253  | 4214.72 | 0.27 | 3335.77    | 35 | 38   | 3338.60 | 0.08 |
| 150-R-2-P | 844.57     | 9  | 1    | 844.57  | 0.00 | 2097.23    | 21 | 161  | 2097.25 | 0.00 | 2980.59    | 32 | 443  | 2992.01 | 0.38 |
| average   |            |    |      |         | 0.16 |            |    |      |         | 0.26 |            |    |      |         | 0.35 |

The notation of Table A.1 is used - **D** suffix denotes the delivery sub-problems of the original instances - **P** suffix denotes the pick-up sub-problems of the original instances

Table A.8. Computational Results obtained for the 2|OS|BiVRP configuration of the 2L-BiVRP model

| Instance  | PD Class 0 |    |      |         |      | PD Class 1 |    |       |         |      | PD Class 2 |    |      |         |      |
|-----------|------------|----|------|---------|------|------------|----|-------|---------|------|------------|----|------|---------|------|
|           | bst        | v  | t    | avg     | %g   | bst        | v  | t     | avg     | %g   | bst        | v  | t    | avg     | %g   |
| 50-C-0-D  | 1331.79    | 13 | 2351 | 1331.79 | 0.00 | 1107.71    | 11 | 821   | 1107.71 | 0.00 | 842.81     | 7  | 3274 | 843.79  | 0.12 |
| 50-C-0-P  | 318.70     | 2  | 0    | 318.70  | 0.00 | 555.03     | 5  | 1     | 555.03  | 0.00 | 843.13     | 7  | 846  | 844.39  | 0.15 |
| 70-C-0-D  | 1246.88    | 18 | 1295 | 1247.22 | 0.03 | 1007.58    | 14 | 1889  | 1010.80 | 0.32 | 812.57     | 11 | 3672 | 813.18  | 0.08 |
| 70-C-0-P  | 319.90     | 3  | 0    | 319.90  | 0.00 | 581.00     | 6  | 5560  | 581.00  | 0.00 | 779.22     | 10 | 3538 | 782.00  | 0.36 |
| 90-C-0-D  | 2180.66    | 23 | 5047 | 2190.56 | 0.45 | 1817.41    | 19 | 2468  | 1827.17 | 0.54 | 1381.66    | 14 | 4147 | 1382.22 | 0.04 |
| 90-C-0-P  | 457.42     | 3  | 14   | 457.42  | 0.00 | 805.71     | 8  | 1242  | 805.71  | 0.00 | 1272.97    | 12 | 1458 | 1283.74 | 0.85 |
| 110-C-0-D | 2119.41    | 28 | 3533 | 2122.90 | 0.16 | 1780.77    | 22 | 3265  | 1786.37 | 0.31 | 1389.42    | 17 | 7089 | 1394.63 | 0.38 |
| 110-C-0-P | 455.94     | 4  | 97   | 455.94  | 0.00 | 868.97     | 10 | 3155  | 873.54  | 0.53 | 1245.95    | 15 | 7577 | 1247.98 | 0.16 |
| 130-C-0-D | 2999.21    | 33 | 2757 | 3024.59 | 0.85 | 2464.14    | 27 | 1545  | 2469.53 | 0.22 | 1992.02    | 21 | 1731 | 1995.02 | 0.15 |
| 130-C-0-P | 645.93     | 5  | 5    | 645.93  | 0.00 | 1150.09    | 11 | 1117  | 1150.09 | 0.00 | 1715.26    | 17 | 3335 | 1737.17 | 1.28 |
| 150-C-0-D | 3153.22    | 37 | 2481 | 3168.33 | 0.48 | 2557.65    | 31 | 8329  | 2565.84 | 0.32 | 2065.30    | 23 | 2141 | 2073.27 | 0.39 |
| 150-C-0-P | 705.73     | 6  | 970  | 705.73  | 0.00 | 1205.62    | 12 | 1284  | 1207.76 | 0.18 | 1804.87    | 20 | 4460 | 1813.62 | 0.48 |
| 50-C-1-D  | 1359.16    | 13 | 1288 | 1397.46 | 2.82 | 1110.25    | 10 | 4454  | 1110.68 | 0.04 | 907.05     | 8  | 193  | 907.05  | 0.00 |
| 50-C-1-P  | 294.11     | 2  | 0    | 294.11  | 0.00 | 551.36     | 5  | 3296  | 551.89  | 0.10 | 842.02     | 8  | 1    | 842.02  | 0.00 |
| 70-C-1-D  | 1135.93    | 17 | 3488 | 1137.82 | 0.17 | 1055.41    | 14 | 3055  | 1055.50 | 0.01 | 761.93     | 10 | 4997 | 761.95  | 0.00 |
| 70-C-1-P  | 328.66     | 3  | 1    | 328.66  | 0.00 | 460.20     | 6  | 20    | 460.20  | 0.00 | 773.18     | 10 | 2814 | 773.74  | 0.07 |
| 90-C-1-D  | 2139.01    | 22 | 2550 | 2168.63 | 1.39 | 1710.75    | 18 | 4942  | 1722.77 | 0.70 | 1340.01    | 14 | 6952 | 1345.01 | 0.37 |
| 90-C-1-P  | 448.28     | 3  | 40   | 448.28  | 0.00 | 806.68     | 7  | 851   | 809.93  | 0.40 | 1173.77    | 12 | 4065 | 1182.89 | 0.78 |
| 110-C-1-D | 2017.89    | 28 | 2418 | 2029.62 | 0.58 | 1691.02    | 21 | 3272  | 1714.22 | 1.37 | 1326.48    | 17 | 4523 | 1332.24 | 0.43 |
| 110-C-1-P | 416.27     | 4  | 215  | 416.27  | 0.00 | 775.98     | 10 | 4889  | 778.77  | 0.36 | 1149.31    | 14 | 4736 | 1156.44 | 0.62 |
| 130-C-1-D | 2884.28    | 31 | 4974 | 2910.86 | 0.92 | 2354.37    | 25 | 4620  | 2372.67 | 0.78 | 1847.03    | 19 | 3923 | 1856.50 | 0.51 |
| 130-C-1-P | 569.81     | 5  | 4    | 569.81  | 0.00 | 1112.82    | 11 | 4667  | 1114.35 | 0.14 | 1689.30    | 17 | 533  | 1693.64 | 0.26 |
| 150-C-1-D | 3124.63    | 37 | 6550 | 3146.77 | 0.71 | 2519.80    | 30 | 3732  | 2579.55 | 2.37 | 1984.57    | 23 | 3919 | 1993.67 | 0.46 |
| 150-C-1-P | 670.89     | 5  | 2703 | 674.61  | 0.55 | 1175.41    | 13 | 4045  | 1176.55 | 0.10 | 1837.23    | 19 | 3129 | 1851.21 | 0.76 |
| 50-C-2-D  | 2086.39    | 21 | 51   | 2086.39 | 0.00 | 1951.10    | 19 | 20    | 1951.10 | 0.00 | 1448.69    | 13 | 129  | 1448.69 | 0.00 |
| 50-C-2-P  | 335.23     | 3  | 0    | 335.23  | 0.00 | 585.43     | 5  | 0     | 585.43  | 0.00 | 1143.45    | 11 | 31   | 1143.45 | 0.00 |
| 70-C-2-D  | 1899.51    | 30 | 1057 | 1900.25 | 0.04 | 1489.87    | 21 | 722   | 1489.87 | 0.00 | 1233.31    | 16 | 503  | 1234.03 | 0.06 |
| 70-C-2-P  | 443.14     | 5  | 0    | 443.14  | 0.00 | 852.98     | 12 | 6     | 852.98  | 0.00 | 1216.42    | 18 | 749  | 1216.64 | 0.02 |
| 90-C-2-D  | 3399.76    | 37 | 1351 | 3413.60 | 0.41 | 2701.62    | 31 | 827   | 2701.62 | 0.00 | 1977.70    | 21 | 1230 | 1991.41 | 0.69 |
| 90-C-2-P  | 602.63     | 6  | 1    | 602.63  | 0.00 | 1345.96    | 13 | 14    | 1345.96 | 0.00 | 2032.15    | 21 | 1532 | 2053.68 | 1.06 |
| 110-C-2-D | 3960.85    | 51 | 1201 | 3987.51 | 0.67 | 3175.16    | 41 | 1481  | 3184.61 | 0.30 | 2328.51    | 29 | 670  | 2342.87 | 0.62 |
| 110-C-2-P | 448.29     | 4  | 29   | 448.29  | 0.00 | 1156.89    | 15 | 58    | 1156.89 | 0.00 | 2097.17    | 27 | 1650 | 2112.09 | 0.71 |
| 130-C-2-D | 4697.78    | 54 | 432  | 4704.45 | 0.14 | 4218.39    | 45 | 1451  | 4230.91 | 0.30 | 3054.59    | 32 | 788  | 3065.24 | 0.35 |
| 130-C-2-P | 863.46     | 7  | 160  | 863.46  | 0.00 | 1406.29    | 14 | 671   | 1406.40 | 0.01 | 2521.23    | 27 | 891  | 2522.03 | 0.03 |
| 150-C-2-D | 4824.11    | 60 | 2699 | 4855.32 | 0.65 | 3965.62    | 49 | 2167  | 3985.74 | 0.51 | 3010.37    | 35 | 950  | 3013.56 | 0.11 |
| 150-C-2-P | 941.10     | 9  | 67   | 941.10  | 0.00 | 1945.33    | 20 | 221   | 1945.71 | 0.02 | 2796.43    | 34 | 2447 | 2817.50 | 0.75 |
| 50-R-0-D  | 1327.00    | 13 | 1382 | 1327.00 | 0.00 | 1159.73    | 11 | 3033  | 1159.73 | 0.00 | 896.10     | 7  | 1505 | 896.10  | 0.00 |
| 50-R-0-P  | 399.25     | 2  | 0    | 399.25  | 0.00 | 588.97     | 4  | 167   | 588.97  | 0.00 | 948.36     | 7  | 20   | 949.60  | 0.13 |
| 70-R-0-D  | 1752.93    | 18 | 8224 | 1754.00 | 0.06 | 1457.05    | 14 | 17599 | 1460.23 | 0.22 | 1176.71    | 11 | 419  | 1187.20 | 0.89 |
| 70-R-0-P  | 510.47     | 3  | 7    | 510.47  | 0.00 | 856.82     | 6  | 4687  | 856.82  | 0.00 | 1141.38    | 10 | 1977 | 1141.38 | 0.00 |
| 90-R-0-D  | 2213.05    | 24 | 1439 | 2218.67 | 0.25 | 1898.98    | 19 | 2497  | 1903.47 | 0.24 | 1458.10    | 14 | 3660 | 1458.94 | 0.06 |
| 90-R-0-P  | 566.70     | 3  | 137  | 566.70  | 0.00 | 958.95     | 8  | 811   | 958.95  | 0.00 | 1347.91    | 13 | 4730 | 1348.98 | 0.08 |
| 110-R-0-D | 2668.79    | 28 | 6228 | 2674.87 | 0.23 | 2215.52    | 22 | 7107  | 2224.34 | 0.40 | 1762.14    | 17 | 1822 | 1772.34 | 0.58 |
| 110-R-0-P | 705.19     | 4  | 12   | 705.19  | 0.00 | 1209.75    | 10 | 4542  | 1214.39 | 0.38 | 1674.97    | 15 | 8078 | 1678.17 | 0.19 |
| 130-R-0-D | 3097.20    | 33 | 4798 | 3111.66 | 0.47 | 2632.01    | 27 | 2025  | 2642.22 | 0.39 | 2066.28    | 20 | 2430 | 2081.92 | 0.76 |
| 130-R-0-P | 690.68     | 5  | 6    | 690.68  | 0.00 | 1334.22    | 11 | 4286  | 1343.21 | 0.67 | 1847.76    | 17 | 4070 | 1853.90 | 0.83 |
| 150-R-0-D | 3327.99    | 37 | 1983 | 3345.65 | 0.53 | 2916.63    | 32 | 1929  | 2930.38 | 0.47 | 2256.40    | 23 | 5067 | 2274.73 | 0.31 |
| 150-R-0-P | 810.54     | 6  | 196  | 811.03  | 0.06 | 1343.37    | 12 | 5990  | 1347.00 | 0.27 | 2030.04    | 20 | 6861 | 2038.26 | 0.40 |
| 50-R-1-D  | 1366.07    | 13 | 2607 | 1369.30 | 0.24 | 1136.65    | 10 | 3722  | 1139.30 | 0.23 | 961.74     | 8  | 5741 | 962.02  | 0.03 |
| 50-R-1-P  | 378.01     | 2  | 1    | 378.01  | 0.00 | 671.65     | 5  | 135   | 671.65  | 0.00 | 904.77     | 7  | 1859 | 906.92  | 0.24 |
| 70-R-1-D  | 1660.04    | 17 | 1125 | 1664.82 | 0.29 | 1502.74    | 14 | 6250  | 1517.18 | 0.96 | 1146.17    | 10 | 4931 | 1146.86 | 0.06 |
| 70-R-1-P  | 534.03     | 3  | 93   | 534.03  | 0.00 | 736.42     | 6  | 93    | 736.42  | 0.00 | 1090.60    | 10 | 5782 | 1090.85 | 0.02 |
| 90-R-1-D  | 2178.20    | 23 | 3450 | 2191.65 | 0.62 | 1808.63    | 19 | 5988  | 1812.13 | 0.19 | 1409.55    | 14 | 939  | 1411.86 | 0.16 |
| 90-R-1-P  | 515.19     | 3  | 3    | 515.19  | 0.00 | 933.66     | 7  | 784   | 936.23  | 0.28 | 1309.50    | 12 | 2794 | 1309.50 | 0.00 |
| 110-R-1-D | 2584.96    | 27 | 4815 | 2598.60 | 0.53 | 2189.41    | 21 | 9071  | 2212.09 | 1.04 | 1729.82    | 17 | 5422 | 1748.96 | 1.11 |
| 110-R-1-P | 618.03     | 4  | 16   | 618.03  | 0.00 | 1140.14    | 9  | 2543  | 1144.84 | 0.41 | 1529.74    | 14 | 4912 | 1533.71 | 0.26 |
| 130-R-1-D | 3007.91    | 32 | 1204 | 3019.33 | 0.38 | 2538.46    | 25 | 4834  | 2566.60 | 1.11 | 1983.33    | 19 | 2802 | 2006.75 | 1.18 |
| 130-R-1-P | 687.01     | 5  | 2    | 687.01  | 0.00 | 1283.86    | 11 | 2650  | 1289.40 | 0.43 | 1855.26    | 17 | 3240 | 1869.30 | 0.76 |
| 150-R-1-D | 3376.54    | 37 | 4423 | 3400.50 | 0.71 | 2781.03    | 30 | 5687  | 2799.58 | 0.67 | 2230.02    | 23 | 1955 | 2245.52 | 0.70 |
| 150-R-1-P | 740.73     | 5  | 678  | 741.43  | 0.10 | 1386.34    | 13 | 4497  | 1395.96 | 0.69 | 1946.64    | 20 | 3706 | 1957.23 | 0.54 |
| 50-R-2-D  | 2067.54    | 21 | 133  | 2067.54 | 0.00 | 1951.15    | 19 | 29    | 1951.15 | 0.00 | 1425.42    | 13 | 63   | 1425.42 | 0.00 |
| 50-R-2-P  | 285.43     | 3  | 0    | 285.43  | 0.00 | 573.09     | 5  | 6     | 573.09  | 0.00 | 1091.08    | 11 | 133  | 1091.08 | 0.00 |
| 70-R-2-D  | 2664.35    | 31 | 734  | 2664.35 | 0.00 | 2185.77    | 22 | 401   | 2191.25 | 0.25 | 1603.48    | 16 | 1016 | 1603.48 | 0.00 |
| 70-R-2-P  | 588.32     | 5  | 0    | 588.32  | 0.00 | 1140.63    | 12 | 77    | 1140.63 | 0.00 | 1806.23    | 19 | 653  | 1806.23 | 0.00 |
| 90-R-2-D  | 3328.00    | 37 | 1247 | 3337.89 | 0.30 | 2700.04    | 30 | 478   | 2700.04 | 0.00 | 2194.11    | 22 | 1062 | 2194.11 | 0.00 |
| 90-R-2-P  | 736.25     | 6  | 1    | 736.25  | 0.00 | 1380.58    | 13 | 1242  | 1380.90 | 0.02 | 1881.82    | 22 | 196  | 1881.82 | 0.00 |
| 110-R-2-D | 4531.04    | 53 | 823  | 4533.02 | 0.04 | 3783.02    | 42 | 460   | 3786.58 | 0.09 | 2682.59    | 28 | 644  | 2685.80 | 0.12 |
| 110-R-2-P | 593.40     | 4  | 1    | 593.40  | 0.00 | 1396.38    | 15 | 64    | 1396.38 | 0.00 | 2524.68    | 27 | 1853 | 2524.68 | 0.00 |
| 130-R-2-D | 4912.45    | 55 | 2099 | 4922.88 | 0.21 | 4215.22    | 47 | 1604  | 4227.72 | 0.30 | 3263.84    | 33 | 264  | 3271.77 | 0.24 |
| 130-R-2-P | 831.49     | 7  | 68   | 831.49  | 0.00 | 1592.82    | 14 | 669   | 1594.75 | 0.12 | 2543.33    | 28 | 2416 | 2550.95 | 0.30 |
| 150-R-2-D | 5351.25    | 59 | 2784 | 5369.33 | 0.34 | 4237.66    | 48 | 911   | 4253.30 | 0.37 | 3351.26    | 35 | 1357 | 3359.32 | 0.24 |
| 150-R-2-P | 858.40     | 9  | 27   | 858.40  | 0.00 | 2098.10    | 21 | 2152  | 2098.10 | 0.00 | 2999.62    | 33 | 1791 | 3007.45 | 0.26 |
| average   |            |    |      |         | 0.23 |            |    |       |         | 0.38 |            |    |      |         | 0.33 |

The notation of Table A.7 is used



Table A.9. Computational Results obtained for the 2|RU|BiVRP configuration of the 2L-BiVRP model

| Instance  | PD Class 0 |    |       |         |      | PD Class 1 |    |      |         |      | PD Class 2 |    |       |         |      |
|-----------|------------|----|-------|---------|------|------------|----|------|---------|------|------------|----|-------|---------|------|
|           | bst        | v  | t     | avg     | %g   | bst        | v  | t    | avg     | %g   | bst        | v  | t     | avg     | %g   |
| 50-C-0-D  | 1302.82    | 12 | 802   | 1302.82 | 0.00 | 1070.72    | 10 | 223  | 1081.55 | 1.01 | 811.17     | 7  | 2552  | 811.75  | 0.07 |
| 50-C-0-P  | 318.70     | 2  | 0     | 318.70  | 0.00 | 553.99     | 4  | 1    | 554.97  | 0.18 | 837.36     | 7  | 939   | 838.38  | 0.12 |
| 70-C-0-D  | 1198.45    | 17 | 4000  | 1204.46 | 0.50 | 977.55     | 14 | 5081 | 983.92  | 0.65 | 794.56     | 10 | 1904  | 794.77  | 0.03 |
| 70-C-0-P  | 319.90     | 3  | 3     | 319.90  | 0.00 | 573.69     | 6  | 439  | 575.04  | 0.24 | 754.81     | 10 | 1892  | 756.78  | 0.26 |
| 90-C-0-D  | 2135.07    | 22 | 2466  | 2146.13 | 0.52 | 1767.25    | 18 | 2676 | 1777.30 | 0.57 | 1308.59    | 13 | 6030  | 1311.61 | 0.23 |
| 90-C-0-P  | 457.42     | 3  | 5     | 457.42  | 0.00 | 802.57     | 8  | 131  | 802.84  | 0.03 | 1245.48    | 12 | 1465  | 1245.94 | 0.04 |
| 110-C-0-D | 2077.60    | 27 | 8134  | 2084.49 | 0.33 | 1698.43    | 21 | 489  | 1709.41 | 0.65 | 1331.66    | 16 | 4153  | 1334.40 | 0.21 |
| 110-C-0-P | 454.03     | 4  | 28    | 454.03  | 0.00 | 847.03     | 9  | 5061 | 849.28  | 0.27 | 1180.52    | 15 | 2455  | 1210.54 | 2.54 |
| 130-C-0-D | 2919.96    | 32 | 5615  | 2934.62 | 0.50 | 2401.33    | 26 | 3643 | 2414.03 | 0.53 | 1894.95    | 20 | 6271  | 1901.55 | 0.35 |
| 130-C-0-P | 645.93     | 5  | 154   | 645.93  | 0.00 | 1129.99    | 11 | 2427 | 1133.46 | 0.31 | 1670.13    | 17 | 6172  | 1681.35 | 0.67 |
| 150-C-0-D | 3057.39    | 36 | 8132  | 3095.32 | 1.24 | 2464.75    | 30 | 5355 | 2483.38 | 0.76 | 2018.22    | 23 | 6113  | 2024.79 | 0.33 |
| 150-C-0-P | 701.78     | 5  | 13082 | 702.00  | 0.03 | 1183.19    | 12 | 5901 | 1190.66 | 0.63 | 1770.15    | 19 | 3806  | 1782.21 | 0.68 |
| 50-C-1-D  | 1324.53    | 13 | 29    | 1325.79 | 0.10 | 1062.10    | 10 | 11   | 1062.10 | 0.00 | 893.22     | 7  | 506   | 893.47  | 0.03 |
| 50-C-1-P  | 294.11     | 2  | 0     | 294.11  | 0.00 | 543.83     | 5  | 0    | 543.83  | 0.00 | 827.69     | 7  | 364   | 828.10  | 0.05 |
| 70-C-1-D  | 1114.56    | 16 | 1515  | 1117.52 | 0.27 | 1027.57    | 14 | 1358 | 1030.48 | 0.28 | 757.91     | 10 | 161   | 759.05  | 0.15 |
| 70-C-1-P  | 315.97     | 3  | 0     | 315.97  | 0.00 | 455.51     | 5  | 3    | 455.51  | 0.00 | 739.39     | 9  | 340   | 741.25  | 0.25 |
| 90-C-1-D  | 2022.32    | 22 | 1425  | 2024.79 | 0.12 | 1678.26    | 18 | 1271 | 1684.71 | 0.38 | 1298.93    | 13 | 508   | 1299.44 | 0.04 |
| 90-C-1-P  | 446.14     | 3  | 2     | 446.14  | 0.00 | 791.05     | 7  | 67   | 792.29  | 0.16 | 1148.24    | 12 | 144   | 1148.36 | 0.01 |
| 110-C-1-D | 1954.87    | 26 | 1145  | 1978.02 | 1.18 | 1657.89    | 20 | 608  | 1667.21 | 0.56 | 1274.54    | 16 | 1207  | 1280.48 | 0.47 |
| 110-C-1-P | 413.97     | 4  | 1     | 413.97  | 0.00 | 760.36     | 9  | 1172 | 762.35  | 0.26 | 1115.86    | 14 | 179   | 1115.92 | 0.01 |
| 130-C-1-D | 2749.33    | 30 | 1288  | 2777.75 | 1.03 | 2257.01    | 24 | 102  | 2272.76 | 0.70 | 1794.09    | 19 | 1120  | 1811.39 | 0.96 |
| 130-C-1-P | 560.82     | 5  | 1     | 560.82  | 0.00 | 1088.54    | 10 | 757  | 1095.49 | 0.64 | 1551.70    | 16 | 315   | 1563.92 | 0.79 |
| 150-C-1-D | 2999.63    | 36 | 1526  | 3021.03 | 0.71 | 2426.12    | 29 | 741  | 2431.91 | 0.24 | 1919.17    | 22 | 611   | 1933.41 | 0.74 |
| 150-C-1-P | 661.59     | 5  | 101   | 662.27  | 0.10 | 1136.63    | 12 | 756  | 1136.92 | 0.03 | 1739.00    | 19 | 359   | 1743.76 | 0.27 |
| 50-C-2-D  | 1997.17    | 20 | 11    | 1997.17 | 0.00 | 1910.45    | 19 | 43   | 1910.45 | 0.00 | 1421.52    | 13 | 85    | 1421.52 | 0.00 |
| 50-C-2-P  | 252.97     | 2  | 0     | 252.97  | 0.00 | 579.90     | 5  | 0    | 579.90  | 0.00 | 1140.01    | 11 | 203   | 1140.01 | 0.00 |
| 70-C-2-D  | 1874.59    | 30 | 199   | 1877.32 | 0.15 | 1476.72    | 21 | 182  | 1477.24 | 0.04 | 1160.09    | 16 | 110   | 1160.09 | 0.00 |
| 70-C-2-P  | 443.14     | 5  | 0     | 443.14  | 0.00 | 838.13     | 12 | 23   | 838.13  | 0.00 | 1171.54    | 19 | 32    | 1171.54 | 0.00 |
| 90-C-2-D  | 3237.63    | 36 | 709   | 3264.68 | 0.84 | 2625.30    | 29 | 447  | 2638.81 | 0.51 | 1886.81    | 20 | 617   | 1894.63 | 0.41 |
| 90-C-2-P  | 572.59     | 6  | 0     | 572.59  | 0.00 | 1296.23    | 13 | 293  | 1296.24 | 0.00 | 1984.30    | 20 | 284   | 1990.16 | 0.30 |
| 110-C-2-D | 3817.77    | 49 | 955   | 3842.78 | 0.66 | 3057.39    | 39 | 468  | 3073.05 | 0.51 | 2263.03    | 28 | 102   | 2272.34 | 0.41 |
| 110-C-2-P | 439.43     | 4  | 5     | 439.43  | 0.00 | 1155.27    | 15 | 36   | 1155.27 | 0.00 | 2043.64    | 27 | 174   | 2044.87 | 0.06 |
| 130-C-2-D | 4569.55    | 52 | 642   | 4590.77 | 0.46 | 4115.80    | 45 | 445  | 4133.27 | 0.42 | 2972.60    | 32 | 401   | 2981.52 | 0.30 |
| 130-C-2-P | 862.99     | 7  | 12    | 862.99  | 0.00 | 1374.77    | 13 | 703  | 1377.29 | 0.18 | 2492.16    | 27 | 546   | 2493.28 | 0.04 |
| 150-C-2-D | 4663.62    | 58 | 940   | 4702.66 | 0.84 | 3859.76    | 47 | 1336 | 3888.90 | 0.75 | 2905.36    | 34 | 519   | 2916.81 | 0.39 |
| 150-C-2-P | 928.77     | 9  | 1     | 928.77  | 0.00 | 1897.58    | 19 | 601  | 1898.92 | 0.07 | 2691.09    | 32 | 238   | 2702.76 | 0.43 |
| 50-R-0-D  | 1280.18    | 12 | 4260  | 1284.17 | 0.31 | 1133.09    | 10 | 1525 | 1134.10 | 0.09 | 872.16     | 7  | 349   | 873.63  | 0.17 |
| 50-R-0-P  | 397.46     | 2  | 0     | 399.15  | 0.43 | 580.41     | 4  | 182  | 580.41  | 0.00 | 921.48     | 7  | 776   | 921.58  | 0.01 |
| 70-R-0-D  | 1685.53    | 17 | 4197  | 1698.25 | 0.75 | 1411.64    | 14 | 674  | 1418.95 | 0.52 | 1134.41    | 10 | 1903  | 1137.86 | 0.30 |
| 70-R-0-P  | 507.02     | 3  | 24    | 510.47  | 0.68 | 827.76     | 6  | 123  | 827.76  | 0.00 | 1111.38    | 10 | 1123  | 1112.21 | 0.07 |
| 90-R-0-D  | 2141.39    | 23 | 2147  | 2158.15 | 0.78 | 1830.47    | 18 | 6803 | 1838.22 | 0.42 | 1421.14    | 13 | 670   | 1424.86 | 0.26 |
| 90-R-0-P  | 564.79     | 3  | 92    | 565.43  | 0.11 | 924.94     | 8  | 2306 | 934.17  | 1.00 | 1319.70    | 12 | 2540  | 1329.71 | 0.76 |
| 110-R-0-D | 2585.86    | 27 | 4243  | 2594.19 | 0.32 | 2181.22    | 22 | 5109 | 2187.69 | 0.30 | 1717.20    | 16 | 6807  | 1723.91 | 0.39 |
| 110-R-0-P | 704.11     | 4  | 138   | 705.19  | 0.15 | 1196.58    | 9  | 4103 | 1205.07 | 0.71 | 1626.20    | 14 | 5457  | 1654.18 | 1.72 |
| 130-R-0-D | 3023.11    | 32 | 5386  | 3031.62 | 0.28 | 2527.14    | 26 | 5233 | 2545.79 | 0.74 | 2021.49    | 20 | 945   | 2038.27 | 0.83 |
| 130-R-0-P | 687.48     | 5  | 2     | 687.48  | 0.00 | 1289.56    | 10 | 4193 | 1304.75 | 1.18 | 1817.87    | 17 | 1206  | 1823.88 | 0.33 |
| 150-R-0-D | 3230.87    | 36 | 1464  | 3252.49 | 0.67 | 2820.84    | 30 | 2834 | 2838.29 | 0.62 | 2198.81    | 22 | 10224 | 2210.85 | 0.55 |
| 150-R-0-P | 796.44     | 5  | 1224  | 796.72  | 0.04 | 1308.21    | 11 | 5026 | 1317.41 | 0.70 | 1987.13    | 19 | 5527  | 1997.43 | 0.52 |
| 50-R-1-D  | 1302.67    | 13 | 81    | 1302.67 | 0.00 | 1091.38    | 10 | 132  | 1094.84 | 0.32 | 910.99     | 7  | 95    | 912.50  | 0.17 |
| 50-R-1-P  | 378.01     | 2  | 0     | 378.01  | 0.00 | 665.16     | 5  | 7    | 665.16  | 0.00 | 880.78     | 7  | 42    | 881.21  | 0.05 |
| 70-R-1-D  | 1616.31    | 17 | 1709  | 1616.96 | 0.04 | 1411.85    | 14 | 988  | 1413.53 | 0.12 | 1107.63    | 10 | 244   | 1110.70 | 0.28 |
| 70-R-1-P  | 514.68     | 3  | 0     | 514.68  | 0.00 | 712.68     | 5  | 14   | 713.17  | 0.07 | 1052.32    | 9  | 846   | 1053.84 | 0.14 |
| 90-R-1-D  | 2090.03    | 22 | 1317  | 2093.33 | 0.16 | 1740.53    | 18 | 703  | 1742.52 | 0.11 | 1351.63    | 13 | 29    | 1353.77 | 0.16 |
| 90-R-1-P  | 512.27     | 3  | 6     | 512.27  | 0.00 | 883.72     | 7  | 258  | 889.62  | 0.67 | 1274.35    | 11 | 114   | 1279.09 | 0.37 |
| 110-R-1-D | 2492.95    | 26 | 766   | 2505.31 | 0.50 | 2067.96    | 21 | 669  | 2078.62 | 0.52 | 1671.42    | 16 | 567   | 1676.60 | 0.31 |
| 110-R-1-P | 612.00     | 4  | 14    | 612.00  | 0.00 | 1104.66    | 9  | 977  | 1104.66 | 0.00 | 1464.31    | 14 | 184   | 1474.44 | 0.69 |
| 130-R-1-D | 2884.48    | 30 | 757   | 2903.72 | 0.67 | 2409.11    | 24 | 257  | 2418.92 | 0.41 | 1918.39    | 18 | 1241  | 1937.98 | 1.02 |
| 130-R-1-P | 680.92     | 5  | 17    | 682.49  | 0.23 | 1233.93    | 11 | 806  | 1234.75 | 0.07 | 1784.87    | 16 | 1060  | 1798.94 | 0.79 |
| 150-R-1-D | 3226.71    | 36 | 795   | 3242.76 | 0.50 | 2659.66    | 28 | 536  | 2683.77 | 0.91 | 2155.16    | 22 | 1560  | 2165.77 | 0.49 |
| 150-R-1-P | 726.44     | 5  | 1719  | 726.92  | 0.07 | 1325.02    | 12 | 1599 | 1328.18 | 0.24 | 1874.77    | 19 | 792   | 1879.15 | 0.23 |
| 50-R-2-D  | 1994.24    | 21 | 120   | 1994.24 | 0.00 | 1844.07    | 19 | 8    | 1844.07 | 0.00 | 1377.60    | 13 | 173   | 1377.60 | 0.00 |
| 50-R-2-P  | 285.43     | 3  | 0     | 285.43  | 0.00 | 502.79     | 5  | 0    | 502.79  | 0.00 | 1072.68    | 10 | 352   | 1072.68 | 0.00 |
| 70-R-2-D  | 2609.99    | 31 | 514   | 2609.99 | 0.00 | 2119.00    | 22 | 475  | 2119.00 | 0.00 | 1556.55    | 16 | 504   | 1556.55 | 0.00 |
| 70-R-2-P  | 588.32     | 5  | 0     | 588.32  | 0.00 | 1080.14    | 11 | 18   | 1080.14 | 0.00 | 1731.14    | 19 | 99    | 1731.14 | 0.00 |
| 90-R-2-D  | 3123.08    | 36 | 462   | 3128.74 | 0.18 | 2576.36    | 29 | 272  | 2581.37 | 0.19 | 2045.52    | 22 | 553   | 2045.52 | 0.00 |
| 90-R-2-P  | 709.03     | 5  | 1     | 709.03  | 0.00 | 1353.57    | 13 | 294  | 1353.57 | 0.00 | 1839.47    | 20 | 142   | 1840.78 | 0.07 |
| 110-R-2-D | 4428.03    | 51 | 73    | 4433.53 | 0.12 | 3595.77    | 40 | 635  | 3601.68 | 0.16 | 2623.00    | 28 | 901   | 2625.52 | 0.10 |
| 110-R-2-P | 576.12     | 4  | 0     | 576.12  | 0.00 | 1365.34    | 15 | 619  | 1366.34 | 0.07 | 2465.46    | 27 | 572   | 2466.41 | 0.04 |
| 130-R-2-D | 4767.14    | 53 | 668   | 4779.52 | 0.26 | 4111.05    | 47 | 462  | 4118.45 | 0.18 | 3141.55    | 31 | 280   | 3164.70 | 0.74 |
| 130-R-2-P | 817.68     | 7  | 31    | 817.68  | 0.00 | 1540.52    | 14 | 1194 | 1543.20 | 0.17 | 2487.37    | 27 | 116   | 2505.77 | 0.74 |
| 150-R-2-D | 5210.59    | 57 | 335   | 5232.75 | 0.43 | 4120.88    | 48 | 270  | 4141.19 | 0.49 | 3214.38    | 33 | 1147  | 3222.71 | 0.26 |
| 150-R-2-P | 841.03     | 9  | 165   | 841.03  | 0.00 | 2042.03    | 21 | 740  | 2042.03 | 0.00 | 2902.94    | 32 | 21    | 2922.75 | 0.68 |
| average   |            |    |       |         | 0.24 |            |    |      |         | 0.31 |            |    |       |         | 0.35 |

The notation of Table A.7 is used

Table A.10. Computational Results obtained for the 2|RS|BiVRP configuration of the 2L-BiVRP model

| Instance  | PD Class 0 |    |       |         |      | PD Class 1 |    |       |         |      | PD Class 2 |    |       |         |      |
|-----------|------------|----|-------|---------|------|------------|----|-------|---------|------|------------|----|-------|---------|------|
|           | bst        | v  | t     | avg     | %g   | bst        | v  | t     | avg     | %g   | bst        | v  | t     | avg     | %g   |
| 50-C-0-D  | 1315.28    | 12 | 2525  | 1319.12 | 0.29 | 1097.60    | 10 | 221   | 1103.03 | 0.50 | 816.74     | 7  | 1001  | 817.32  | 0.07 |
| 50-C-0-P  | 318.70     | 2  | 0     | 318.70  | 0.00 | 555.03     | 5  | 1     | 555.03  | 0.00 | 839.89     | 7  | 3722  | 840.15  | 0.03 |
| 70-C-0-D  | 1209.98    | 17 | 5015  | 1217.65 | 0.63 | 999.19     | 14 | 6098  | 999.95  | 0.08 | 798.65     | 10 | 1052  | 799.60  | 0.12 |
| 70-C-0-P  | 319.90     | 3  | 1     | 319.90  | 0.00 | 576.48     | 6  | 3651  | 576.48  | 0.00 | 765.90     | 10 | 4575  | 773.48  | 0.99 |
| 90-C-0-D  | 2145.51    | 23 | 963   | 2147.04 | 0.07 | 1777.41    | 19 | 7935  | 1790.85 | 0.76 | 1338.97    | 14 | 11191 | 1341.93 | 0.22 |
| 90-C-0-P  | 457.42     | 3  | 22    | 457.42  | 0.00 | 802.57     | 8  | 1556  | 802.57  | 0.00 | 1246.74    | 12 | 9045  | 1247.17 | 0.03 |
| 110-C-0-D | 2089.18    | 27 | 12142 | 2095.30 | 0.29 | 1734.83    | 22 | 5030  | 1750.52 | 0.90 | 1383.46    | 17 | 3412  | 1385.05 | 0.12 |
| 110-C-0-P | 454.03     | 4  | 5     | 454.03  | 0.00 | 852.64     | 9  | 10001 | 856.44  | 0.45 | 1202.46    | 15 | 13381 | 1234.57 | 2.67 |
| 130-C-0-D | 2940.39    | 33 | 6450  | 2948.35 | 0.27 | 2425.64    | 27 | 2999  | 2431.98 | 0.26 | 1904.40    | 20 | 7796  | 1910.21 | 0.31 |
| 130-C-0-P | 645.93     | 5  | 115   | 645.93  | 0.00 | 1131.73    | 11 | 5339  | 1138.94 | 0.64 | 1686.39    | 17 | 10392 | 1699.19 | 0.76 |
| 150-C-0-D | 3109.86    | 36 | 5654  | 3137.11 | 0.88 | 2522.10    | 31 | 8748  | 2531.86 | 0.39 | 2034.96    | 23 | 8508  | 2043.12 | 0.40 |
| 150-C-0-P | 702.63     | 6  | 5236  | 702.85  | 0.03 | 1193.63    | 12 | 207   | 1200.71 | 0.59 | 1779.12    | 19 | 9489  | 1791.65 | 0.70 |
| 50-C-1-D  | 1332.60    | 13 | 512   | 1332.60 | 0.00 | 1072.32    | 10 | 1561  | 1072.32 | 0.00 | 905.70     | 8  | 140   | 905.70  | 0.00 |
| 50-C-1-P  | 294.11     | 2  | 0     | 294.11  | 0.00 | 548.30     | 5  | 562   | 548.30  | 0.00 | 828.50     | 7  | 841   | 833.21  | 0.57 |
| 70-C-1-D  | 1124.75    | 17 | 2368  | 1124.75 | 0.00 | 1038.22    | 14 | 2517  | 1040.87 | 0.26 | 761.22     | 10 | 2084  | 761.24  | 0.00 |
| 70-C-1-P  | 328.30     | 3  | 1     | 328.30  | 0.00 | 459.01     | 5  | 713   | 459.01  | 0.00 | 756.07     | 9  | 362   | 770.01  | 1.84 |
| 90-C-1-D  | 2068.51    | 22 | 3981  | 2089.07 | 0.99 | 1698.43    | 18 | 2011  | 1709.21 | 0.63 | 1329.58    | 14 | 905   | 1331.05 | 0.11 |
| 90-C-1-P  | 449.52     | 3  | 174   | 449.52  | 0.00 | 800.28     | 7  | 1781  | 800.56  | 0.03 | 1156.35    | 12 | 1755  | 1157.44 | 0.09 |
| 110-C-1-D | 1998.96    | 27 | 3143  | 2002.41 | 0.17 | 1681.01    | 21 | 2163  | 1684.69 | 0.22 | 1299.99    | 16 | 1894  | 1310.61 | 0.82 |
| 110-C-1-P | 414.26     | 4  | 9     | 414.26  | 0.00 | 765.98     | 9  | 3464  | 766.48  | 0.07 | 1127.96    | 14 | 1817  | 1131.21 | 0.29 |
| 130-C-1-D | 2839.67    | 31 | 1953  | 2860.54 | 0.73 | 2319.71    | 25 | 2433  | 2328.79 | 0.39 | 1825.06    | 19 | 1798  | 1830.40 | 0.29 |
| 130-C-1-P | 565.55     | 5  | 31    | 565.55  | 0.00 | 1108.35    | 11 | 3612  | 1109.31 | 0.09 | 1638.85    | 17 | 1072  | 1649.26 | 0.63 |
| 150-C-1-D | 3072.70    | 37 | 4166  | 3094.33 | 0.70 | 2461.94    | 29 | 4137  | 2475.14 | 0.54 | 1956.12    | 22 | 2071  | 1966.63 | 0.54 |
| 150-C-1-P | 667.88     | 5  | 4543  | 671.95  | 0.61 | 1151.52    | 12 | 3870  | 1160.14 | 0.75 | 1789.78    | 19 | 527   | 1799.45 | 0.54 |
| 50-C-2-D  | 2038.29    | 21 | 49    | 2038.29 | 0.00 | 1910.86    | 18 | 115   | 1910.95 | 0.00 | 1433.42    | 13 | 172   | 1433.42 | 0.00 |
| 50-C-2-P  | 258.37     | 2  | 0     | 258.37  | 0.00 | 580.77     | 5  | 0     | 580.77  | 0.00 | 1141.20    | 11 | 249   | 1141.20 | 0.00 |
| 70-C-2-D  | 1876.64    | 30 | 66    | 1878.59 | 0.10 | 1480.14    | 21 | 1063  | 1480.18 | 0.00 | 1163.43    | 16 | 604   | 1163.43 | 0.00 |
| 70-C-2-P  | 443.14     | 5  | 0     | 443.14  | 0.00 | 841.39     | 12 | 18    | 841.39  | 0.00 | 1175.03    | 19 | 115   | 1175.03 | 0.00 |
| 90-C-2-D  | 3291.80    | 36 | 725   | 3312.68 | 0.63 | 2628.73    | 29 | 678   | 2650.17 | 0.82 | 1892.50    | 20 | 1188  | 1904.60 | 0.64 |
| 90-C-2-P  | 577.70     | 6  | 2     | 577.70  | 0.00 | 1306.96    | 13 | 63    | 1306.96 | 0.00 | 1994.35    | 20 | 1051  | 2005.48 | 0.56 |
| 110-C-2-D | 3846.77    | 50 | 743   | 3881.47 | 0.90 | 3060.70    | 39 | 328   | 3068.83 | 0.27 | 2267.73    | 28 | 226   | 2285.20 | 0.77 |
| 110-C-2-P | 446.04     | 4  | 24    | 446.04  | 0.00 | 1155.27    | 15 | 104   | 1155.27 | 0.00 | 2048.39    | 27 | 32    | 2048.39 | 0.00 |
| 130-C-2-D | 4571.98    | 52 | 426   | 4592.86 | 0.46 | 4137.33    | 45 | 187   | 4146.47 | 0.22 | 2983.76    | 33 | 395   | 2985.80 | 0.07 |
| 130-C-2-P | 862.99     | 7  | 29    | 862.99  | 0.00 | 1384.55    | 13 | 305   | 1390.21 | 0.41 | 2494.28    | 27 | 1073  | 2494.41 | 0.01 |
| 150-C-2-D | 4676.52    | 58 | 325   | 4714.51 | 0.81 | 3876.03    | 47 | 1468  | 3887.17 | 0.29 | 2913.51    | 34 | 906   | 2924.16 | 0.37 |
| 150-C-2-P | 928.77     | 9  | 3     | 928.77  | 0.00 | 1903.89    | 19 | 655   | 1905.08 | 0.06 | 2719.24    | 33 | 129   | 2722.91 | 0.13 |
| 50-R-0-D  | 1298.02    | 13 | 3922  | 1298.02 | 0.00 | 1148.94    | 10 | 5808  | 1149.45 | 0.04 | 883.73     | 7  | 7791  | 883.73  | 0.00 |
| 50-R-0-P  | 397.46     | 2  | 1     | 397.46  | 0.00 | 588.68     | 4  | 13    | 588.68  | 0.00 | 935.48     | 7  | 272   | 935.48  | 0.00 |
| 70-R-0-D  | 1702.35    | 18 | 5340  | 1702.54 | 0.01 | 1425.53    | 14 | 8625  | 1427.80 | 0.16 | 1162.69    | 11 | 4961  | 1171.82 | 0.78 |
| 70-R-0-P  | 507.02     | 3  | 12    | 507.02  | 0.00 | 827.76     | 6  | 151   | 827.76  | 0.00 | 1122.54    | 10 | 5120  | 1131.03 | 0.76 |
| 90-R-0-D  | 2159.01    | 23 | 2908  | 2159.10 | 0.00 | 1867.23    | 19 | 5737  | 1877.10 | 0.53 | 1436.46    | 14 | 6889  | 1436.93 | 0.03 |
| 90-R-0-P  | 564.79     | 3  | 31    | 564.79  | 0.00 | 933.97     | 8  | 2812  | 933.97  | 0.00 | 1320.78    | 12 | 10288 | 1331.87 | 0.84 |
| 110-R-0-D | 2608.89    | 27 | 7319  | 2624.00 | 0.58 | 2194.35    | 22 | 4455  | 2196.88 | 0.12 | 1740.99    | 17 | 8413  | 1745.14 | 0.24 |
| 110-R-0-P | 704.11     | 4  | 3     | 704.11  | 0.00 | 1204.31    | 10 | 4011  | 1204.31 | 0.00 | 1657.00    | 15 | 5378  | 1664.81 | 0.47 |
| 130-R-0-D | 3042.46    | 32 | 715   | 3054.12 | 0.38 | 2571.10    | 27 | 13681 | 2590.77 | 0.77 | 2053.32    | 20 | 2077  | 2060.18 | 0.33 |
| 130-R-0-P | 690.68     | 5  | 336   | 690.68  | 0.00 | 1313.72    | 11 | 7309  | 1329.77 | 1.22 | 1834.94    | 17 | 6787  | 1844.44 | 0.41 |
| 150-R-0-D | 3273.90    | 37 | 2426  | 3284.57 | 0.33 | 2850.45    | 31 | 12185 | 2870.83 | 0.72 | 2231.55    | 23 | 21449 | 2239.52 | 0.36 |
| 150-R-0-P | 802.64     | 6  | 309   | 802.68  | 0.00 | 1327.71    | 12 | 7642  | 1329.61 | 0.14 | 2002.28    | 19 | 7472  | 2024.23 | 1.10 |
| 50-R-1-D  | 1337.33    | 13 | 715   | 1338.72 | 0.10 | 1115.57    | 10 | 1576  | 1122.52 | 0.62 | 941.13     | 8  | 450   | 941.13  | 0.00 |
| 50-R-1-P  | 378.01     | 2  | 1     | 378.01  | 0.00 | 671.65     | 5  | 24    | 671.65  | 0.00 | 895.96     | 7  | 2369  | 896.60  | 0.07 |
| 70-R-1-D  | 1640.78    | 17 | 1881  | 1641.55 | 0.05 | 1446.69    | 14 | 3956  | 1455.96 | 0.64 | 1129.60    | 10 | 4075  | 1129.60 | 0.00 |
| 70-R-1-P  | 528.02     | 3  | 65    | 528.02  | 0.00 | 723.94     | 5  | 2267  | 723.94  | 0.00 | 1083.90    | 10 | 674   | 1083.92 | 0.00 |
| 90-R-1-D  | 2119.16    | 22 | 1722  | 2131.91 | 0.60 | 1777.45    | 18 | 1829  | 1782.02 | 0.26 | 1375.72    | 13 | 2682  | 1389.76 | 1.02 |
| 90-R-1-P  | 514.42     | 3  | 37    | 514.42  | 0.00 | 912.19     | 7  | 537   | 913.53  | 0.15 | 1299.86    | 12 | 2465  | 1299.91 | 0.00 |
| 110-R-1-D | 2562.08    | 27 | 1110  | 2571.18 | 0.35 | 2118.93    | 21 | 4976  | 2132.35 | 0.63 | 1694.57    | 16 | 2924  | 1700.99 | 0.38 |
| 110-R-1-P | 618.03     | 4  | 3     | 618.03  | 0.00 | 1120.54    | 9  | 3347  | 1121.29 | 0.07 | 1497.12    | 14 | 2765  | 1507.52 | 0.69 |
| 130-R-1-D | 2959.81    | 31 | 1629  | 2969.72 | 0.33 | 2496.64    | 25 | 7433  | 2513.66 | 0.68 | 1957.89    | 19 | 3575  | 1969.28 | 0.58 |
| 130-R-1-P | 686.96     | 5  | 1333  | 686.96  | 0.00 | 1256.82    | 11 | 1325  | 1260.86 | 0.32 | 1839.28    | 17 | 3497  | 1850.78 | 0.63 |
| 150-R-1-D | 3304.34    | 37 | 4621  | 3325.40 | 0.64 | 2745.32    | 29 | 2634  | 2770.12 | 0.90 | 2208.39    | 23 | 3665  | 2215.45 | 0.32 |
| 150-R-1-P | 738.03     | 5  | 259   | 738.03  | 0.00 | 1360.37    | 12 | 5809  | 1373.93 | 1.00 | 1920.06    | 19 | 4170  | 1928.56 | 0.44 |
| 50-R-2-D  | 1998.18    | 21 | 14    | 1998.18 | 0.00 | 1860.54    | 19 | 18    | 1860.54 | 0.00 | 1383.72    | 13 | 66    | 1383.72 | 0.00 |
| 50-R-2-P  | 285.43     | 3  | 0     | 285.43  | 0.00 | 538.26     | 5  | 6     | 538.26  | 0.00 | 1080.60    | 10 | 403   | 1080.60 | 0.00 |
| 70-R-2-D  | 2610.48    | 31 | 86    | 2610.48 | 0.00 | 2121.91    | 22 | 479   | 2121.91 | 0.00 | 1567.94    | 16 | 2     | 1567.94 | 0.00 |
| 70-R-2-P  | 588.32     | 5  | 0     | 588.32  | 0.00 | 1107.43    | 11 | 24    | 1107.43 | 0.00 | 1740.38    | 19 | 66    | 1740.38 | 0.00 |
| 90-R-2-D  | 3135.27    | 36 | 676   | 3138.28 | 0.10 | 2599.17    | 29 | 1044  | 2601.09 | 0.07 | 2072.63    | 22 | 906   | 2075.27 | 0.13 |
| 90-R-2-P  | 725.46     | 5  | 5     | 725.46  | 0.00 | 1372.42    | 13 | 232   | 1372.75 | 0.02 | 1859.08    | 21 | 369   | 1859.57 | 0.03 |
| 110-R-2-D | 4436.54    | 51 | 199   | 4445.47 | 0.20 | 3608.69    | 40 | 649   | 3612.02 | 0.09 | 2647.77    | 28 | 249   | 2657.14 | 0.35 |
| 110-R-2-P | 581.46     | 4  | 0     | 581.46  | 0.00 | 1383.57    | 15 | 549   | 1383.57 | 0.00 | 2482.50    | 27 | 777   | 2486.31 | 0.15 |
| 130-R-2-D | 4797.83    | 54 | 430   | 4806.08 | 0.17 | 4134.98    | 47 | 634   | 4143.74 | 0.21 | 3161.78    | 31 | 757   | 3179.86 | 0.57 |
| 130-R-2-P | 817.68     | 7  | 20    | 817.68  | 0.00 | 1561.86    | 14 | 66    | 1562.13 | 0.02 | 2525.87    | 28 | 150   | 2533.57 | 0.30 |
| 150-R-2-D | 5247.23    | 58 | 659   | 5258.98 | 0.22 | 4140.43    | 48 | 492   | 4153.91 | 0.33 | 3250.14    | 34 | 924   | 3252.31 | 0.07 |
| 150-R-2-P | 858.40     | 9  | 3     | 858.40  | 0.00 | 2046.88    | 21 | 687   | 2046.88 | 0.00 | 2928.75    | 32 | 384   | 2947.94 | 0.66 |
| average   |            |    |       |         | 0.18 |            |    |       |         | 0.27 |            |    |       |         | 0.37 |

The notation of Table A.7 is used
